# Supplementary material for: Two-photon induced isomerization through a cyaninic molecular antenna in azo compounds
Source: Royal Society of Chemistry journal article supplement (doi:10.1039/d0cc08346a), 2021-01-01
Supplement: d0cc08346a1.pdf [file d0cc08346a1.pdf]

## Electronic Supplementary Information

### Two-Photon Induced Isomerization through a Cyaninic Molecular Antenna in Azo Compounds

#### Table of Contents

|                                                                                              |           |
|----------------------------------------------------------------------------------------------|-----------|
| <b>Experimental Procedures and Additional Experiments.....</b>                               | <b>3</b>  |
| General.....                                                                                 | 3         |
| Steady State and Femtosecond Resolved Spectroscopies.....                                    | 3         |
| Detailed Synthetic Procedures and Characterization.....                                      | 3         |
| NMR spectra of all compounds synthesized.....                                                | 6         |
| Steady State Spectroscopy from upper excited electronic states of the IR780 cyanine dye..... | 12        |
| Computational Chemistry Methods.....                                                         | 12        |
| Energy Transfer Rate Constant Calculation.....                                               | 16        |
| <i>E-Z</i> Photo-transformation of the Actuator.....                                         | 20        |
| Non-linear NIR light Excitation and Photoisomerization of CySAP.....                         | 23        |
| Time-resolved Fluorescence Spectroscopy.....                                                 | 26        |
| Anisotropy and Fluorescence Up-Conversion Experiments.....                                   | 27        |
| Kinetic Scheme for the Antenna-Actuator system (Cy-SAP):.....                                | 28        |
| SAP Z-matrix (compact) coordinates ground state (using PBE0 functional).....                 | 36        |
| SAP Z-matrix (compact) coordinates ground state (using M06 functional).....                  | 37        |
| Cy Z-matrix (compact) coordinates ground state (using PBE0 functional).....                  | 38        |
| Cy Z-matrix (compact) coordinates ground state (using M06 functional).....                   | 40        |
| <b>References .....</b>                                                                      | <b>42</b> |

#### Table of figures

|                                                                                                                                    |    |
|------------------------------------------------------------------------------------------------------------------------------------|----|
| Figure S1. <sup>1</sup> H NMR (300 MHz, DMSO-d <sub>6</sub> ) spectrum of (E)-2-((4-iodophenyl)diazenil)-N-Methyl-1H-pyrrole ..... | 6  |
| Figure S2. <sup>1</sup> H NMR (300MHz, CDCl <sub>3</sub> ) spectrum of 4-Vinylphenol .....                                         | 7  |
| Figure S3. <sup>1</sup> H NMR (300 MHz, DMSO-d <sub>6</sub> ) spectrum of SAP.....                                                 | 8  |
| Figure S4. <sup>13</sup> C NMR (75 MHz, DMSO) spectrum of SAP.....                                                                 | 9  |
| Figure S5. <sup>1</sup> H NMR (700MHz, CD <sub>2</sub> Cl <sub>2</sub> ) spectrum of Cy-SAP .....                                  | 10 |
| Figure S6. <sup>13</sup> C NMR (176 MHz, CD <sub>2</sub> Cl <sub>2</sub> ) spectrum of Cy-SAP .....                                | 11 |
| Figure S7. Steady state spectroscopy for the higher excited states (S <sub>n</sub> , n>1) of IR780 cyanine dye. ....               | 12 |
| Figure S8. SAP Experimental absorption spectra and calculated vertical transitions .....                                           | 14 |
| Figure S9. IR780 experimental absorption spectra and calculated vertical transitions .....                                         | 15 |
| Figure S10. Comparison between Cy -SAP, IR780 absorption spectra and the Cy-SAP minus IR780 spectra. ....                          | 17 |
| Figure S11. Overlap between absorption spectrum of SAP and emission spectrum of S <sub>2</sub> state of IR780.....                 | 17 |
| Figure S12. Overlap between absorption spectrum of Cy-SAP and emission spectrum of S <sub>2</sub> state of IR780 (line). ....      | 18 |

|                                                                                                                                                                                                                                                             |    |
|-------------------------------------------------------------------------------------------------------------------------------------------------------------------------------------------------------------------------------------------------------------|----|
| Figure S13. Overlap between absorption spectrum of Cy-SAP minus IR780 (green line) an emission spectrum of the S2 excited state of the IR780.....                                                                                                           | 19 |
| Figure S14. Evidence of the phototransformation of the SAP system and the return to the thermally stable isomer (E)....                                                                                                                                     | 20 |
| Figure S15. 1H Spectral evolution of the Z→E thermal isomerization. ....                                                                                                                                                                                    | 20 |
| Figure S16. Absorption spectrum of (E) SAP and (Z) SAP and Absorption spectrum of (E) Cy-SAP and of (Z) Cy-SAP..                                                                                                                                            | 22 |
| Figure S17. Photoisomerization quantum yield (E→Z) of SAP and Cy-SAP .....                                                                                                                                                                                  | 22 |
| Figure S18. Photoisomerization-cycles of SAP and Cy-SAP .....                                                                                                                                                                                               | 22 |
| Figure S19. No-photodecomposition power threshold .....                                                                                                                                                                                                     | 24 |
| Figure S20. Absorption spectrum of Cy-SAP and for comparison, the sum of the absorption spectra of SAP and IR780..                                                                                                                                          | 24 |
| Figure S21. Cy-SAP thermal back-isomerization (Z→E) after two-photon excitation at 860 nm. ....                                                                                                                                                             | 25 |
| Figure S22. Comparison of absolute fluorescence intensities between SAP IR-780 Cy-SAP.....                                                                                                                                                                  | 27 |
| Figure S23. Time resolved emission spectra from (A) IR780 and (B) SAP and (C) Cy-SAP. ....                                                                                                                                                                  | 27 |
| Figure S24. Concentration [%] as a function of time for both states $S2Cy$ and $S1E - SAP$ .....                                                                                                                                                            | 30 |
| Figure S25. Fluorescence up-conversion traces of Cy-SAP and IR780 .....                                                                                                                                                                                     | 31 |
| Figure S26. Time resolved emission at 525 nm with detection in the parallel and perpendicular orientation with respect to the polarization of the 860 nm excitation pulses. (A) IR780, (B) SAP and (C) Cy-SAP.....                                          | 32 |
| Figure S27. Femtosecond fluorescence up-conversion traces of IR780 in acetonitrile solution detecting the parallel and perpendicular emission polarization component of the fluorescence excitation with respect to the excitation polarization axis. ....  | 33 |
| Figure S28. Femtosecond fluorescence up-conversion traces of SAP in acetonitrile solution detecting the parallel and perpendicular emission polarization component of the fluorescence excitation with respect to the excitation polarization axis. ....    | 34 |
| Figure S29. Femtosecond fluorescence up-conversion traces of Cy-SAP in acetonitrile solution detecting the parallel and perpendicular emission polarization component of the fluorescence excitation with respect to the excitation polarization axis. .... | 35 |

## Experimental Procedures and Additional Experiments

### General

IR spectra were acquired on a Perkin-Elmer Spectrum 100 FT-IR spectrometer. NMR spectra were obtained on a Bruker Avance 300 spectrometer, operating at a frequency of 300 MHz for  $^1\text{H}$  and 75 MHz for  $^{13}\text{C}$  on a Bruker Avance III HD 700 spectrometer operating at a  $^1\text{H}$  frequency of 699.95 MHz and 176 MHz for  $^{13}\text{C}$ . We used tetramethylsilane (TMS) as internal reference and  $\text{CDCl}_3$ ,  $\text{CD}_2\text{Cl}_2$ , and  $\text{DMSO-}d_6$  as solvent according to sample solubility. NMR spectra for the observation of the *cis* isomers and in following the *cis-to-trans* thermal relaxation were obtained on a Bruker Avance III HD 700 spectrometer operating at a  $^1\text{H}$  frequency of 699.95 MHz. This spectrometer is equipped with a 5-mm z-axis gradient TCI cryoprobe. For these spectra we used deuterated acetonitrile as solvent ( $\text{CD}_3\text{CN}$ ). Mass spectra were obtained on a JEOL JMSAX505 spectrometer. The values of the signals are expressed in mass/charge units ( $m/z$ ), followed by the relative intensity with reference to a 100% base peak. Elemental analysis by combustion was performed in a Thermo Scientific Flash 2000 at 950°C. Methionine was used as a verification standard.

4-Iodoaniline, *N*-Methyl-1*H*-pyrrole, 4-hydroxyaldehyde, triethylamine, Potassium *tert*-butoxide 1M in THF,  $\text{Ph}_3\text{PCH}_3\text{Br}$  and IR780 iodide, were purchased from SigmaAldrich and used without further purification. The [Pd(*N,N*)-pyrrole ligand] catalyst was synthesized according to a literature procedure<sup>1</sup>.

### Steady State and Femtosecond Resolved Spectroscopies

UV-Vis absorption spectra were recorded in a Cary 50 spectrometer, fluorescence spectra and fluorescence quantum yields were measured in a Varian Cary Eclipse fluorimeter. The solvent used for all experiments was acetonitrile HPLC grade and was acquired from Sigma Aldrich. For the study of the excited state dynamics with two-photon (860 nm) excitation, we employed the femtosecond fluorescence up-conversion technique. Our setup has been described in detail previously.<sup>2-5</sup> Briefly, the pulsed light source was a regeneratively amplified Ti:Sapphire laser tuned at 860 nm. This wavelength was selected in order to guarantee two-photon excitation of the molecules of this study. Tuning to this frequency allows excitation into the higher singlet states in the 430 nm region of the IR780 cyanine or the polymethinic section of Cy-SAP. The laser produced a 1 kHz pulse train with a temporal width of 100 fs and up to 0.8 mJ per pulse. The intensity at the samples was modulated with beamsplitters and a variable neutral optical density filter.

The spontaneous emission from the higher states of the molecules of this study was collected and refocused by a pair of parabolic mirrors, and the residual excitation radiation was removed by a long or short pass filter. The emission was focused into a Type I  $\beta$ -BBO crystal making a small angle respect to the gate-pulse which was previously separated from the fundamental beam and delayed with a translation stage. The polarization of the excitation pulse for the time resolved emission spectra was set to the magic angle (54.7°) respect to the non-linear crystal acceptance direction (vertical). The up-conversion signal was focused into a double monochromator (Oriel) and detected with a photomultiplier tube connected to a lock-in amplifier (Stanford Research Systems) which was referenced to the third sub-harmonic of the laser repetition rate. The instrument response function (IRF) for the up-conversion system was determined to be Gaussian with a FWHM of 260 fs. This was determined from the instrument-limited emission signal rise of coumarin-102 at 460 nm. For the up-conversion experiments, the solutions of Cy-SAP, SAP and IR780 were kept flowing through a 1 mm quartz cell. For the anisotropy measurements, the polarization of the excitation beam was adjusted before the sample so that the parallel or perpendicular component of the fluorescence was up-converted at the crystal.

### Detailed Synthetic Procedures and Characterization

#### (*E*)-2-((4-iodophenyl)diazene)-*N*-Methyl-1*H*-pyrrole – (5)

A 250 ml round-bottomed flask, equipped with a magnetic stir bar, was charged with acetone (15 ml), water (15 ml) and 4-iodoaniline (2.1 g, 9.6 mmol, 1.2 eq.). The resulting mixture was cooled to 0°C and 12M HCl solution was added slowly into the mixture (13 ml, 164 mmol, 20.5 eq.). Next, a  $\text{NaNO}_2$  solution (0.77 g, 10.64 mmol, 1.4 eq. in 5 ml of water) was added dropwise. After an hour, a mixture of acetone (15 ml), water (15 ml), *N*-Methyl-1*H*-pyrrole (0.65 g, 8.0 mmol, 1.0 eq.) and  $\text{Na}_2\text{CO}_3$  (1.7 g, 16 mmol, 2.0 eq.), was transferred slowly into the flask. The mixture was left stirring for another hour.

Then, the acetone was removed in vacuum. Next, the aqueous phase was extracted three times with DCM (50 ml) and the organic phase was dried over anhydrous Na<sub>2</sub>SO<sub>4</sub>. The crude material was purified by column chromatography on silica gel eluting with 5-30% ethyl acetate in hexane to give **5** (2.47g, MW= 311.12 g/mol, 7.9mmol, 99%) as an orange solid.

<sup>1</sup>H NMR (300 MHz, DMSO-d<sub>6</sub>) δ 7.99 – 7.77 (m, 2H), 7.63 – 7.48 (m, 2H), 7.33 (t, J = 2.1 Hz, 1H), 6.65 (dd, J = 4.2, 1.7 Hz, 1H), 6.31 (dd, J = 4.2, 2.6 Hz, 1H), 3.92 (s, 3H).

HRMS [ESI<sup>+</sup>]: calculated for C<sub>11</sub>H<sub>11</sub>N<sub>3</sub> [M+H]<sup>+</sup>: 311.99976, found: 311.99977. Mass diff. (ppm)= 0.01

#### 4-Vinylphenol – (7)

In a round-bottomed flask, Ph<sub>3</sub>PCH<sub>3</sub>Br (5.5 g, 15 mmol, 1.5 eq.) was set at N<sub>2</sub> atmosphere. Next, a solution of t-BuOK in THF (1M, 25 ml, 25 mmol, 2.5 eq.) was poured over and left stirring at room temperature for 10 minutes. Then, 4-hydroxyaldehyde (1.3g, 10.6 mmol, 1.0 eq.) was added and left for 24h at room temperature. The reaction was quenched with 100 ml of saturated NH<sub>4</sub>Cl water solution. The aqueous phase was extracted three times with DCM (50 ml). The organic phase then is washed with brine to remove any salt left and dried over anhydrous Na<sub>2</sub>SO<sub>4</sub>. The crude product was purified with column chromatography on silica gel eluting with 10% ethyl acetate in hexane to give **7** (1.11g, MW=120.15 g/mol, 9.2 mmol, 86.7%) as a white solid.

<sup>1</sup>H NMR (700 MHz, DMSO-d<sub>6</sub>): 9.51 (s, 1H), 7.49 – 7.14 (m, 2H), 6.74 (dd, J = 8.5, 1.5 Hz, 2H), 6.61 (dd, J = 17.6, 10.9 Hz, 1H), 5.58 (dd, J = 17.6, 1.1 Hz, 1H), 5.04 (dd, J = 10.9, 1.1 Hz, 1H).

HRMS [ESI<sup>+</sup>]: calculated for C<sub>8</sub>H<sub>9</sub>O<sub>1</sub> [M+H]<sup>+</sup>: 121.06534, found: 121.06527. Mass diff. (ppm)= -0.60

#### SAP: 4-((E)-4-((E)-(1-methyl-1H-pyrrol-2-yl)diazenyl)styryl)phenol – (1)

A round-bottomed flask was charged with **7** (0.83 g, 6.9 mmol, 1.2 eq), **5** (1.7 g, 5.4 mmol, 1.0 eq), triethylamine (1.82 ml, 10.8 mmol, 2.0 eq), DMF (60 ml) and [Pd(N,N)-pyrrole ligand] catalyst solution (3.6mM in DMF, 3.5 ml, 0.1%). The mixture was stirred at reflux for 2 hours. After cooling, 40 ml of NH<sub>4</sub>Cl saturated solution was added. The mixture was extracted with DCM 3x50ml and the organic phase was thoroughly washed with brine to remove the excess DMF and then, was dried over anhydrous Na<sub>2</sub>SO<sub>4</sub>. The mixture was purified by column chromatography on silica gel eluting with 5-50% ethyl acetate in hexane to give **1** (1.31 g, MW=303.36 g/mol, 4.32 mmol, 77.4%) as a dark orange solid.

<sup>1</sup>H NMR (300 MHz, DMSO-d<sub>6</sub>): 9.64 (s, 1H, H<sub>16</sub>), 7.75 (d, J = 8.6 Hz, 2H, H<sub>7</sub>), 7.66 (d, J = 8.6 Hz, 2H, H<sub>8</sub>), 7.50 – 7.41 (m, 2H, H<sub>13</sub>), 7.30 – 7.17 (m, 2H, H<sub>2</sub>, H<sub>14</sub>), 7.08 (d, J = 16.4 Hz, 1H, H<sub>10</sub>), 6.85 – 6.74 (m, 2H, H<sub>14</sub>), 6.59 (dd, J = 4.1, 1.6 Hz, 1H, H<sub>4</sub>), 6.29 (dd, J = 4.2, 2.6 Hz, 1H, H<sub>3</sub>), 3.93 (s, 3H, H<sub>1</sub>). <sup>13</sup>C NMR (75 MHz, DMSO-d<sub>6</sub>) δ 157.60 (C<sub>15</sub>), 151.84 (C<sub>6</sub>), 146.06 (C<sub>5</sub>), 138.89 (C<sub>9</sub>), 129.62 (C<sub>11</sub>), 128.21 (C<sub>12</sub>), 128.13 (C<sub>13</sub>), 128.01 (C<sub>2</sub>), 126.82 (C<sub>8</sub>), 124.43 (C<sub>10</sub>), 122.13 (C<sub>7</sub>), 115.62 (C<sub>14</sub>), 110.17 (C<sub>3</sub>), 99.61 (C<sub>4</sub>), 33.06 (C<sub>1</sub>). <sup>1</sup>H, <sup>13</sup>C-HSQC (300 MHz / 75 MHz, DMSO-d<sub>6</sub>): δ(<sup>1</sup>H) / δ(<sup>13</sup>C) = 3.93/32.66 (H<sub>1</sub>/ C<sub>1</sub>), 6.29/109.85 (H<sub>3</sub>/ C<sub>3</sub>), 6.60/99.10 (H<sub>4</sub>/ C<sub>4</sub>), 6.79/115.14 (H<sub>14</sub>/ C<sub>14</sub>), 7.12/124.02, 7.05/123.96 (H<sub>10</sub>/ C<sub>10</sub>), 7.22/129.05, 7.28/128.98 (H<sub>11</sub>/ C<sub>11</sub>), 7.27/127.90 (H<sub>2</sub>/ C<sub>2</sub>), 7.46/127.76 (H<sub>13</sub>/ C<sub>13</sub>), 7.67/126.60 (H<sub>8</sub>/ C<sub>8</sub>), 7.74/121.61 (H<sub>7</sub>/C<sub>7</sub>). <sup>1</sup>H, <sup>13</sup>C-HMBC (300 MHz / 75 MHz, DMSO-d<sub>6</sub>): δ(<sup>1</sup>H) / δ(<sup>13</sup>C) = 3.94/128.69, 146.55 (H<sub>1</sub>/ C<sub>2,5</sub>), 6.30/100.06 (H<sub>3</sub>/ C<sub>4</sub>), 6.60/110.64 (H<sub>4</sub>/ C<sub>3</sub>), 6.80/116.09, 128.47, 158.02 (H<sub>14</sub>/ C<sub>14,12,15</sub>), 7.10,7.04/ 138.93, 129.67, 127.11 (H<sub>10</sub>/ C<sub>9,11,12</sub>), 7.22,7.27/ 124.43, 128.21, 138.93 (H<sub>11</sub>/ C<sub>10,12,9</sub>), 7.27/ 99.61, 110.17,146.06 (H<sub>2</sub>/ C<sub>4,3,5</sub>), 7.45/ 156.97, 128.11 (H<sub>13</sub>/ C<sub>15,13</sub>), 7.66/ 124.29, 126.77,151.77 (H<sub>8</sub>/ C<sub>10,8,6</sub>), 7.76/ 122.03, 138.80 (H<sub>7</sub>/ C<sub>7,9</sub>). IR (KBr) v max 3223.73, 3017.84, 2921.32, 1585.35, 1507.37, 1470.79, 1392.32, 1350.68, 1324.78, 1241.87, 1166.83, 1042.97, 959.76, 834.20, 719.73, 539.73. HRMS [ESI<sup>+</sup>]: calculated for C<sub>19</sub>H<sub>18</sub>N<sub>3</sub>O [M+H]<sup>+</sup>: 304.14499, found: 304.14357. Mass diff. (ppm)= -4.65. EA: Calculated: 13.85% N, 75.23% C, 5.65%, found 13.04% N, 73.53% C, 5.45% H.

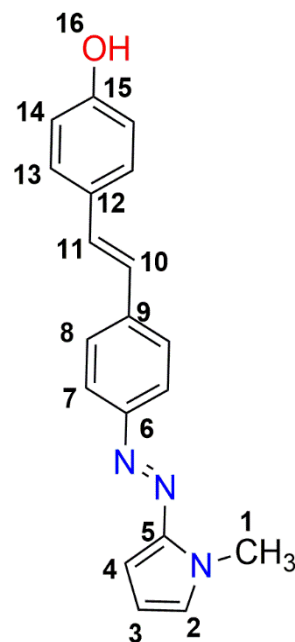

**Cy-SAP: 2-((E)-2-((E)-3-((E)-2-(3,3-dimethyl-1-propylindolin-2-ylidene)ethylidene)-2-(4-((E)-4-((E)-(1-methyl-1H-pyrrol-2-yl)diazanyl)styryl)phenoxy)cyclohex-1-en-1-yl)vinyl)-3,3-dimethyl-1-propyl-3H-indol-1-ium iodide. – (2)**

In an amber round-bottomed flask, IR780-I (0.71g, 1.1 mmol, 1.0 eq.), **1** (2.68g, 2.7 mmol, 2.5 eq.), triethylamine (8.2 ml, 58.9 mmol, 55 eq.) and MeCN anhydrous (80 ml) were charged, then left stirring 24h at room temperature. Then, after the temperature was raised to 40 °C for 2h, the solvents are evaporated in vacuum. The compound **1** was thoroughly removed by two consecutive silica gel column chromatography, using DCM/EtOH (100% →50:50). The crude was purified further by recrystallization by slow diffusion of diethyl ether to a saturated DCM solution. A dark green solid was obtained, which was extensively washed with diethyl ether. The solid was identified as **2** (765.8 mg, MW=934.00 g/mol, 0.82 mmol, 74.5%).

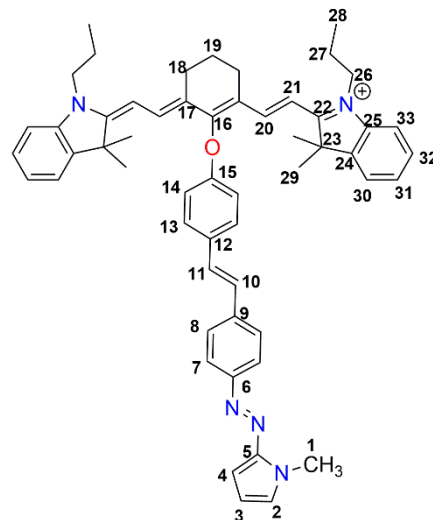

**<sup>1</sup>H NMR** (700 MHz, CD<sub>2</sub>Cl<sub>2</sub>): 7.96 (d, J = 14.1 Hz, 2H, H<sub>20</sub>), 7.85 – 7.74 (m, 2H, H<sub>8</sub>), 7.65 – 7.55 (m, 4H, H<sub>14</sub>, H<sub>7</sub>), 7.36 (td, J = 7.7, 1.2 Hz, 2H, H<sub>32</sub>), 7.30 (dd, J = 7.6, 1.2 Hz, 2H, H<sub>30</sub>), 7.20 (td, J = 7.5, 0.9 Hz, 2H, H<sub>31</sub>), 7.16 (d, J = 16.3 Hz, 1H, H<sub>11</sub>), 7.14 – 7.10 (m, 4H, H<sub>13</sub>, H<sub>33</sub>), 7.09 (d, J = 16.4 Hz, 1H, H<sub>10</sub>), 6.98 (dd, J = 2.6, 1.7 Hz, 1H, H<sub>2</sub>), 6.65 (dd, J = 4.2, 1.7 Hz, 1H, H<sub>4</sub>), 6.28 (dd, J = 4.2, 2.6 Hz, 1H, H<sub>3</sub>), 6.04 (d, J = 14.2 Hz, 2H, H<sub>21</sub>), 3.99 (t, J = 7.9, 7.3 Hz, 4H, H<sub>26</sub>), 3.95 (s, 3H, H<sub>1</sub>), 2.73 (t, J = 6.3 Hz, 4H, H<sub>18</sub>), 2.06 (q, J = 6.3 Hz, 2H, H<sub>19</sub>), 1.86 (h, J = 7.4 Hz, 4H, H<sub>27</sub>), 1.37 (s, 12H, H<sub>29</sub>), 1.04 (t, J = 7.4 Hz, 6H, H<sub>28</sub>). **<sup>13</sup>C NMR** (176 MHz, CD<sub>2</sub>Cl<sub>2</sub>): 172.86 (C<sub>22</sub>), 164.72 (C<sub>16</sub>), 160.19 (C<sub>15</sub>), 153.47 (C<sub>6</sub>), 147.26 (C<sub>5</sub>), 142.82 (C<sub>20</sub>), 142.70 (C<sub>25</sub>), 141.61 (C<sub>24</sub>), 138.84 (C<sub>9</sub>), 132.43 (C<sub>12</sub>), 129.10 (C<sub>7</sub>), 129.06 (C<sub>32</sub>), 128.76 (C<sub>11</sub>), 127.79 (C<sub>10</sub>), 127.51 (C<sub>2</sub>), 127.44 (C<sub>14</sub>), 125.57 (C<sub>31</sub>), 122.96 (C<sub>8</sub>), 122.72 (C<sub>30</sub>), 122.54 (C<sub>17</sub>), 115.64 (C<sub>13</sub>), 111.19 (C<sub>33</sub>), 110.74 (C<sub>3</sub>), 100.38 (C<sub>21</sub>), 100.30 (C<sub>4</sub>), 49.62 (C<sub>23</sub>), 46.50 (C<sub>26</sub>), 33.81 (C<sub>1</sub>), 28.24 (C<sub>29</sub>), 24.94 (C<sub>18</sub>), 21.70 (C<sub>19</sub>), 21.26 (C<sub>27</sub>), 11.88 (C<sub>28</sub>). **<sup>1</sup>H, <sup>1</sup>H-COSY** (700 MHz / 700 MHz, CD<sub>2</sub>Cl<sub>2</sub>): δ(<sup>1</sup>H) / δ(<sup>1</sup>H) = 1.08/1.88 (H<sub>26</sub>/ H<sub>27</sub>), 1.88/4.02 (H<sub>27</sub>/ H<sub>26</sub>), 2.10/2.76 (H<sub>19</sub>/ H<sub>18</sub>), 6.07/8.00 (H<sub>21</sub>/ H<sub>20</sub>), 6.32/6.68, 7.02 (H<sub>3</sub>/ H<sub>4</sub>, H<sub>2</sub>), 7.62/7.16 (H<sub>14</sub>/ H<sub>13</sub>), 7.62/7.82 (H<sub>7</sub>/ H<sub>8</sub>), 7.16/7.40 (H<sub>33</sub>/ H<sub>32</sub>). **<sup>1</sup>H, <sup>13</sup>C-HSQC** (700 MHz / 176 MHz, CD<sub>2</sub>Cl<sub>2</sub>): δ(<sup>1</sup>H) / δ(<sup>13</sup>C) = 1.04/11.29 (H<sub>26</sub>/ C<sub>28</sub>), 1.37/27.67 (H<sub>29</sub>/ C<sub>29</sub>), 1.86/20.66 (H<sub>27</sub>/ C<sub>27</sub>), 2.07/21.13 (H<sub>19</sub>/ C<sub>19</sub>), 2.73/24.40 (H<sub>18</sub>/ C<sub>18</sub>), 3.96/33.05 (H<sub>1</sub>/ C<sub>1</sub>), 3.99/45.90 (H<sub>26</sub>/ C<sub>26</sub>), 6.05/99.80 (H<sub>21</sub>/ C<sub>21</sub>), 6.28/110.01 (H<sub>3</sub>/ C<sub>3</sub>), 6.65/99.50 (H<sub>4</sub>/ C<sub>4</sub>), 6.98/127.02 (H<sub>2</sub>/ C<sub>2</sub>), 7.07/127.15 (H<sub>10</sub>/ C<sub>10</sub>), 7.11/110.62 (H<sub>33</sub>/ C<sub>33</sub>), 7.13/115.05 (H<sub>13</sub>/ C<sub>13</sub>), 7.15/128.08 (H<sub>11</sub>/ C<sub>11</sub>), 7.20/124.98 (H<sub>31</sub>/ C<sub>31</sub>), 7.29/122.17 (H<sub>30</sub>/ C<sub>30</sub>), 7.36/128.53 (H<sub>32</sub>/ C<sub>32</sub>), 7.59/127.88 (H<sub>14</sub>/ C<sub>14</sub>, H<sub>7</sub>/ C<sub>7</sub>), 7.80/122.36 (H<sub>8</sub>/ C<sub>8</sub>), 7.97/142.22 (H<sub>20</sub>/ C<sub>20</sub>). **<sup>1</sup>H, <sup>13</sup>C-HMBC** (700 MHz / 176 MHz, CD<sub>2</sub>Cl<sub>2</sub>): δ(<sup>1</sup>H) / δ(<sup>13</sup>C) = 1.04/20.68, 45.93 (H<sub>26</sub>/ C<sub>27,26</sub>), 1.37/27.65, 49.04, 141.03, 172.27 (H<sub>29</sub>/ C<sub>29,23,24,22</sub>), 1.86/11.29, 45.93 (H<sub>27</sub>/ C<sub>28,26</sub>), 2.06/24.36, 121.98 (H<sub>19</sub>/ C<sub>18,17</sub>), 2.73/24.26, 121.98, 142.13, 164.15 (H<sub>18</sub>/ C<sub>18,17,20,16</sub>), 3.95/127.21, 146.68 (H<sub>1</sub>/ C<sub>2,5</sub>), 3.99/11.29, 20.67/142.25/172.28 (H<sub>26</sub>/ C<sub>28,27,25,22</sub>), 6.04/49.04, 121.96, 142.01 (H<sub>21</sub>/ C<sub>23,17,20</sub>), 6.29/127.19, 146.70 (H<sub>3</sub>/ C<sub>2,5</sub>), 6.66/127.25, 146.70 (H<sub>4</sub>/ C<sub>2,5</sub>), 6.98/99.72/110.15, 127.28, 146.66 (H<sub>2</sub>/ C<sub>4,3,2,5</sub>), 7.08/127.21, 131.91 (H<sub>10</sub>/ C<sub>11,12</sub>), 7.11/124.92, 141.11 (H<sub>33</sub>/ C<sub>31,25</sub>), 7.12/115.07, 131.87, 159.61 (H<sub>13</sub>/ C<sub>13,12,15</sub>), 7.15/128.12, 138.15 (H<sub>11</sub>/ C<sub>11,9</sub>), 7.20/110.62, 122.21, 141.11 (H<sub>31</sub>/ C<sub>33,30,24</sub>), 7.30/49.05, 128.53, 142.24 (H<sub>30</sub>/ C<sub>23,32,25</sub>), 7.36/110.64, 122.20, 142.18 (H<sub>32</sub>/ C<sub>33,30,25</sub>), 7.59/127.43, 159.62 (H<sub>14</sub>/ C<sub>14,15</sub>), 7.60/122.14, 152.90 (H<sub>7</sub>/ C<sub>8,6</sub>), 7.96/24.35, 121.98, 164.15, 172.27 (H<sub>20</sub>/ C<sub>18,17,16,22</sub>). **IR** (KBr) ν<sub>max</sub> 2958.91, 2923.43, 2868.63, 1556.07, 1505.46, 1397.06, 1353.05, 1228.10, 1149.55, 1083.01, 1034.67, 993.80, 912.94, 788.72, 707.09. **HRMS** [FAB<sup>+</sup>]: calculated for C<sub>55</sub>H<sub>60</sub>N<sub>5</sub>O [M]<sup>+</sup>: 806.4798, found: 806.4794. Mass diff. (ppm) = -0.5. **EA**: Calculated, 7.50% H, 70.73% C, 6.48% N; found, 7.14% H, 68.70% C, 6.40

NMR spectra of all compounds synthesized

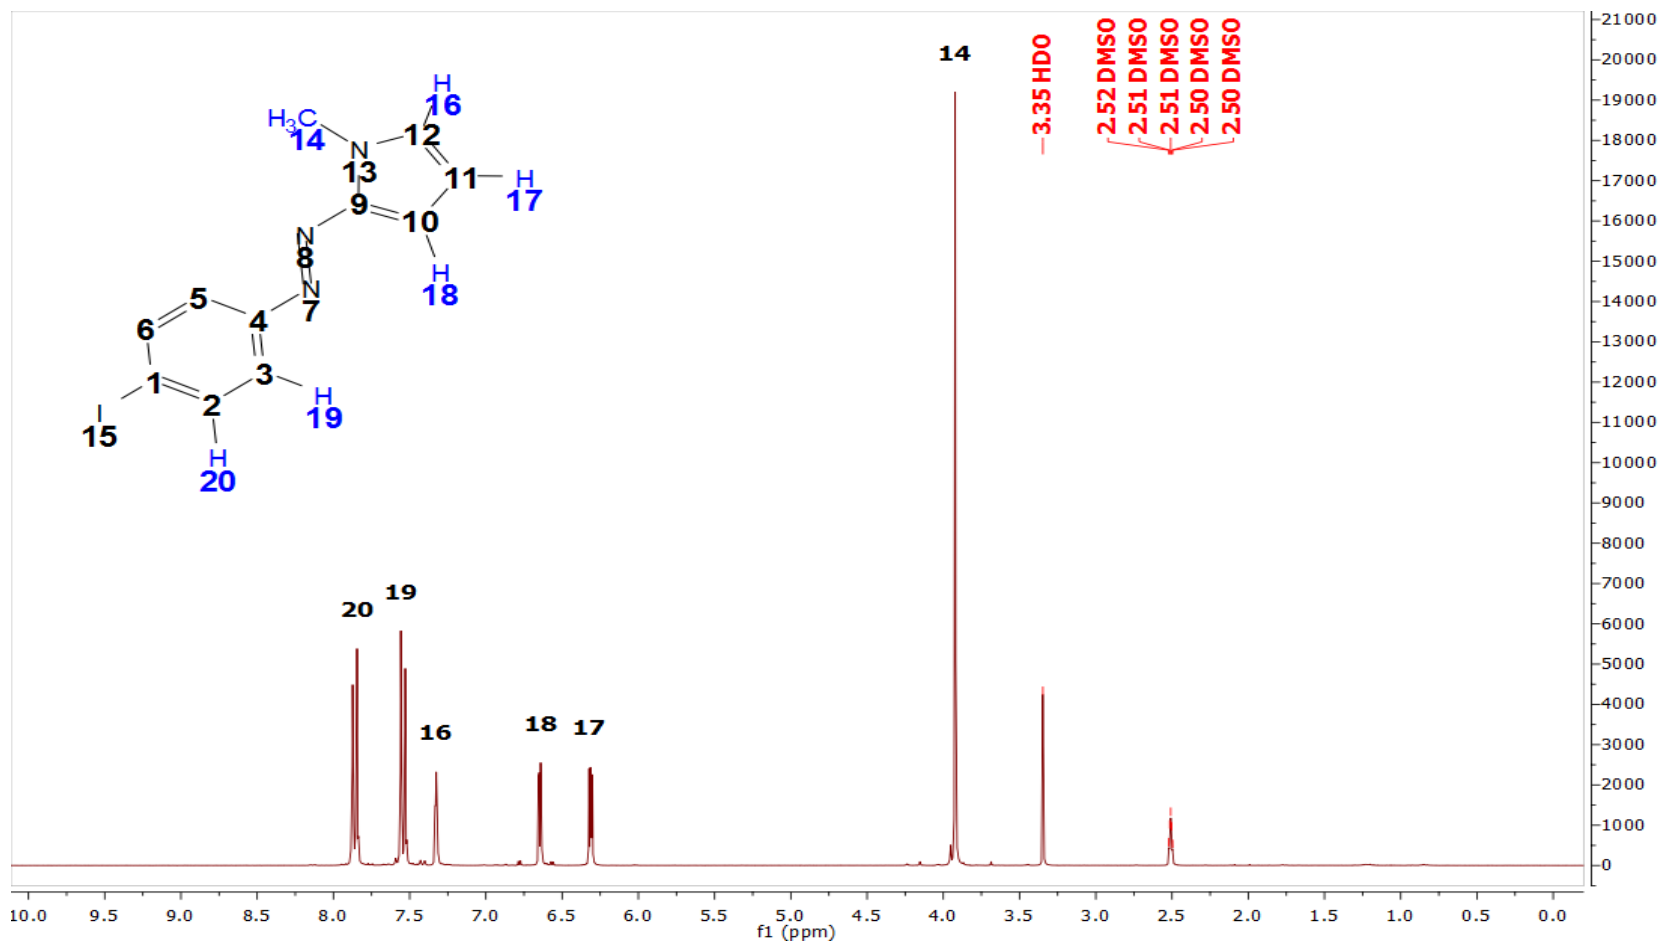

Figure S1. <sup>1</sup>H NMR (300 MHz, DMSO-d<sub>6</sub>) spectrum of (E)-2-((4-iodophenyl)diazenil)-N-Methyl-1H-pyrrole – (5).

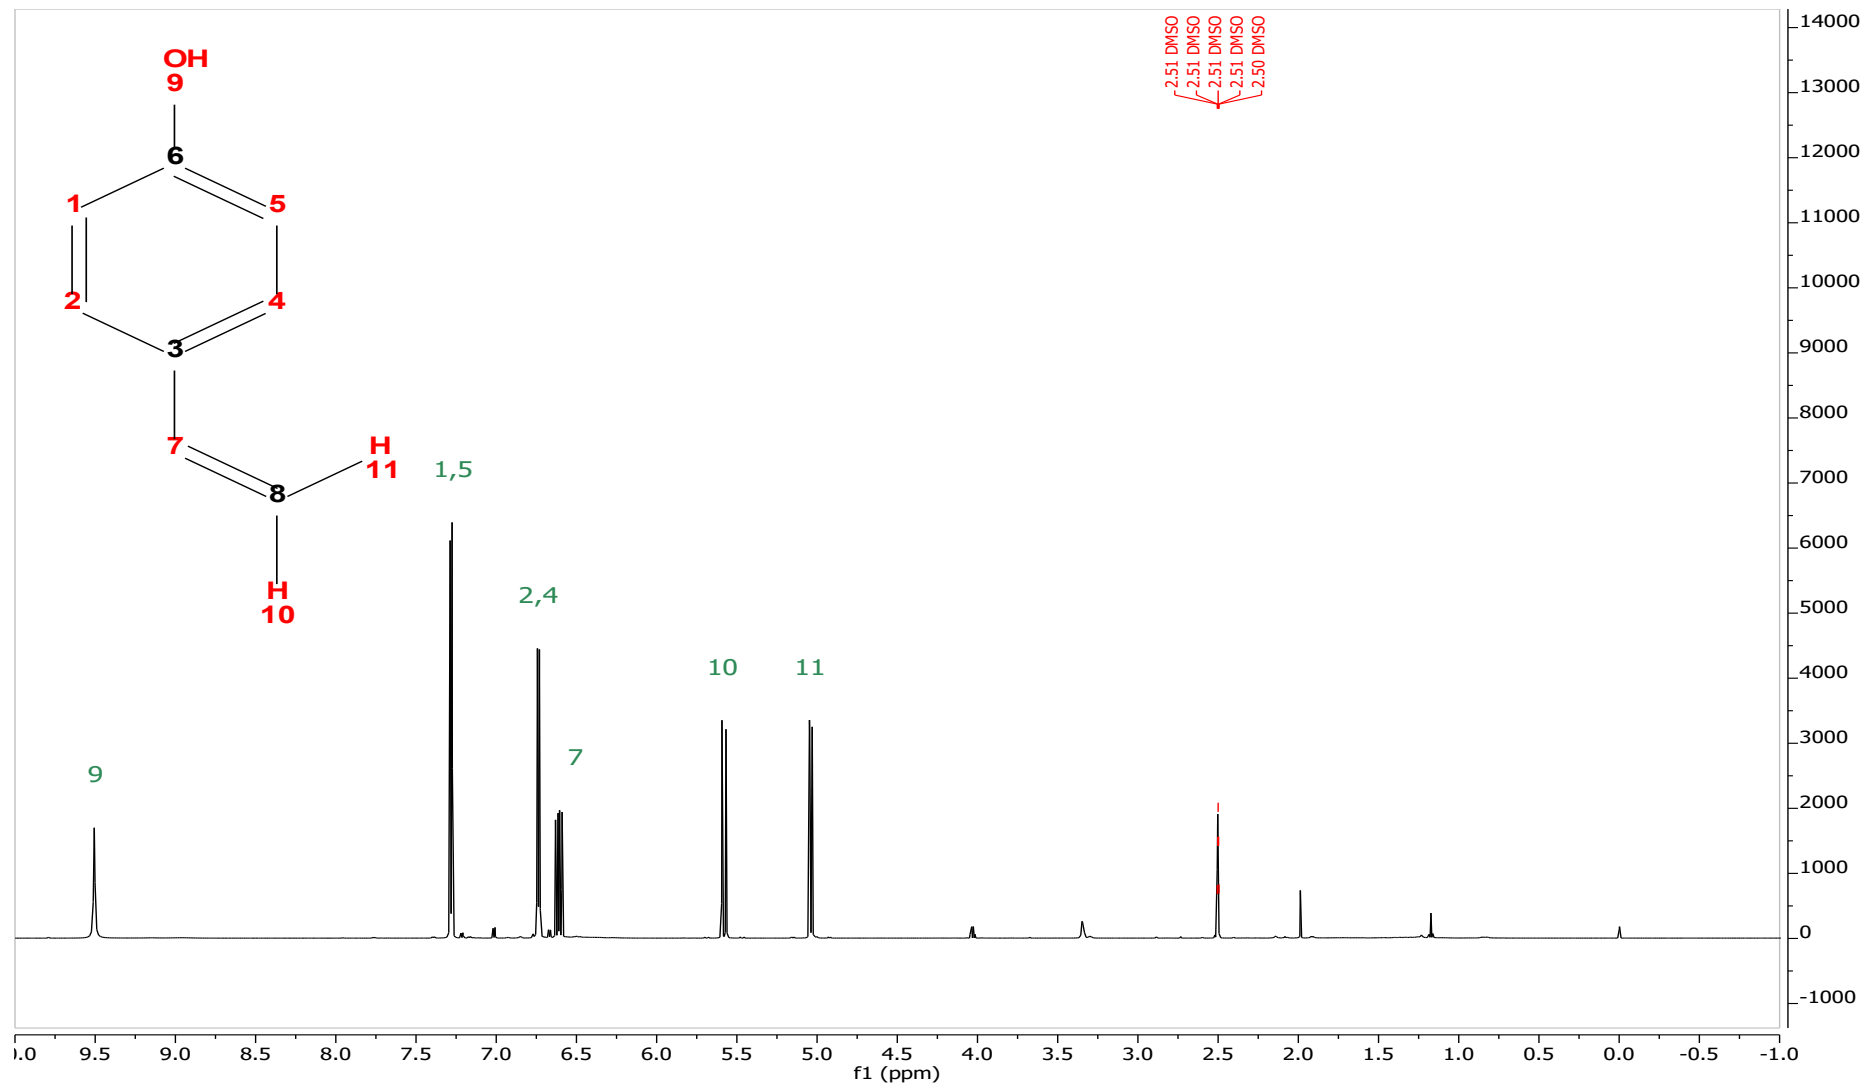

Figure S2. <sup>1</sup>H NMR (300MHz, CDCl<sub>3</sub>) spectrum of 4-Vinylphenol – (7)

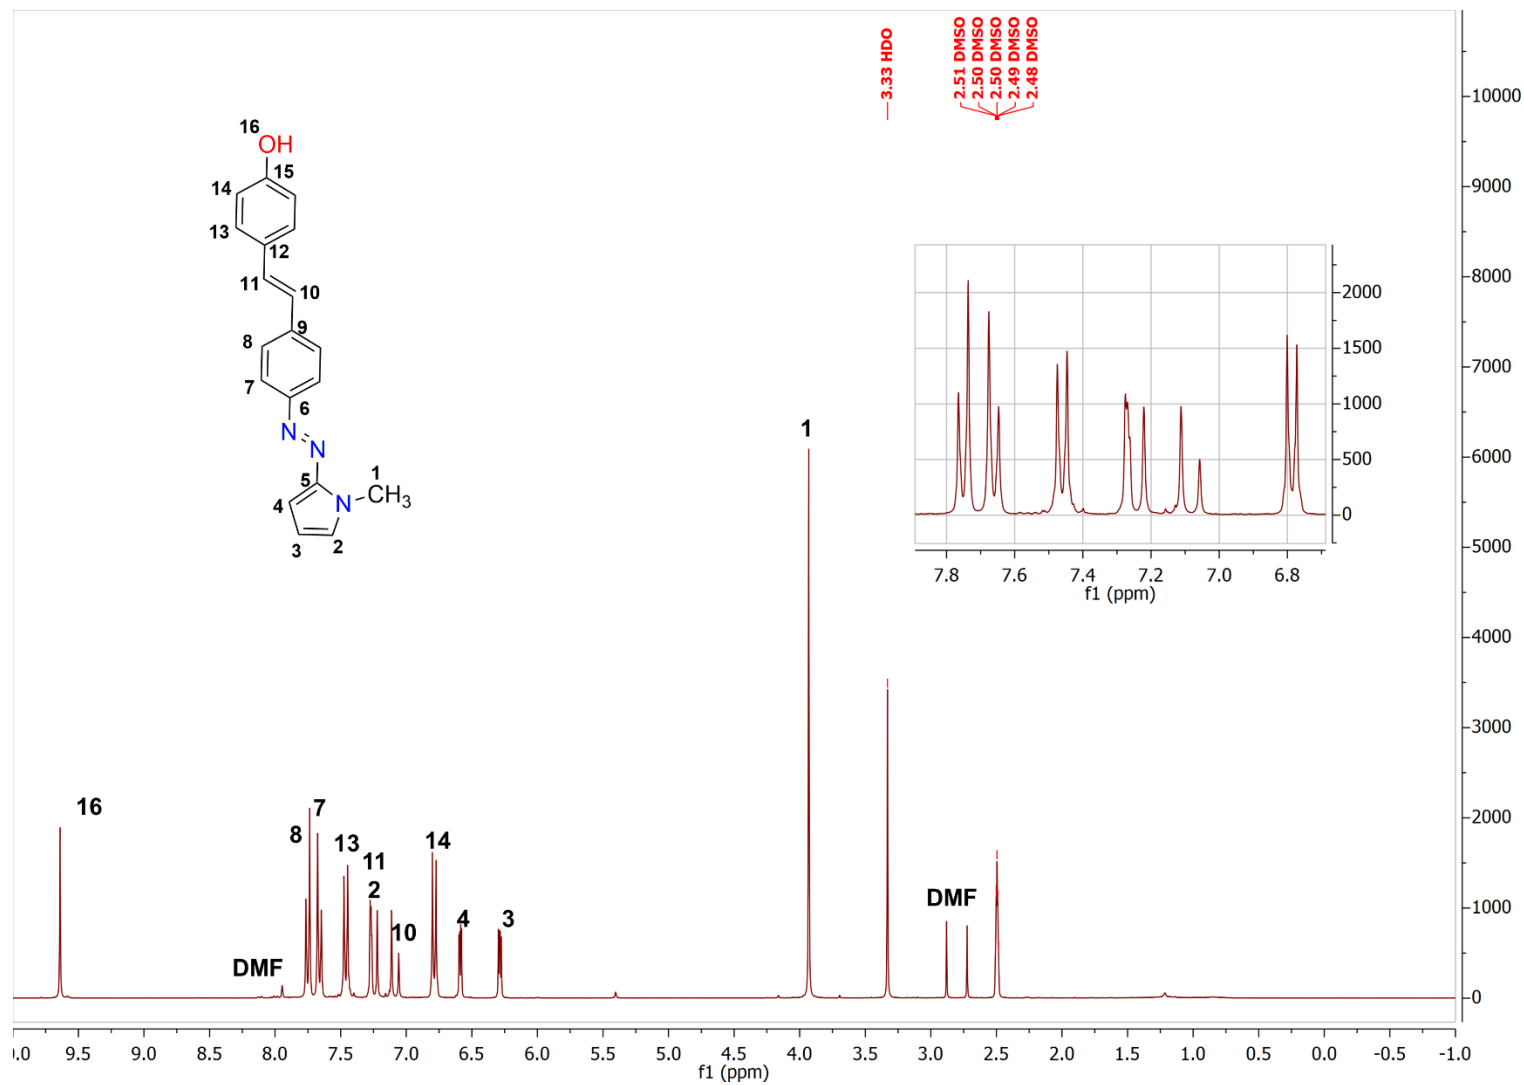

**Figure S3.** <sup>1</sup>H NMR (300 MHz, DMSO-d<sub>6</sub>) spectrum of SAP: 4-((E)-4-((E)-(1-methyl-1H-pyrrol-2-yl)diazenyl)styryl)phenol – (1). <sup>1</sup>H and <sup>13</sup>C chemical shifts are based on HSQC and HMBC NMR spectra. The signals assigned to residual DMF (2.7, 2.8, 7.9 ppm all singlets) are in accordance with values reported in the literature.<sup>6</sup>



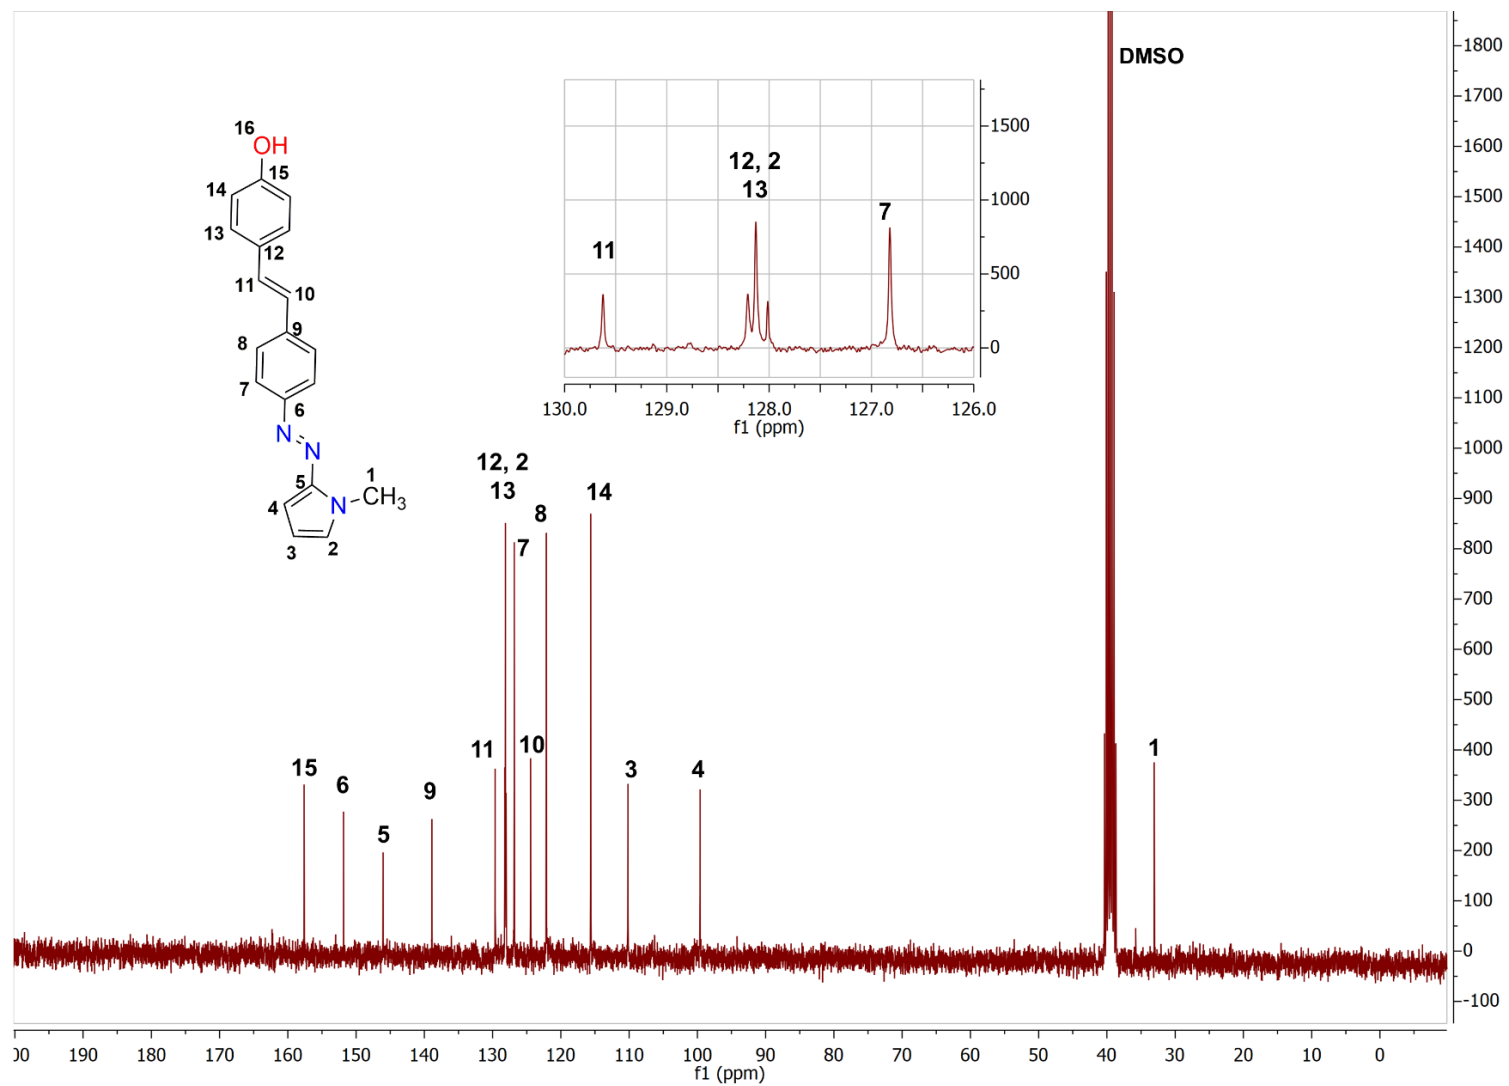

**Figure S4.** <sup>13</sup>C NMR (75 MHz, DMSO) spectrum of SAP: 4-((E)-4-((E)-(1-methyl-1H-pyrrol-2-yl)diazenyl)styryl)phenol – (1). The inset shows an expanded view of the signals crowded around 128 ppm. <sup>1</sup>H and <sup>13</sup>C chemical shifts are based on 2D HSQC, and HMBC NMR spectra.

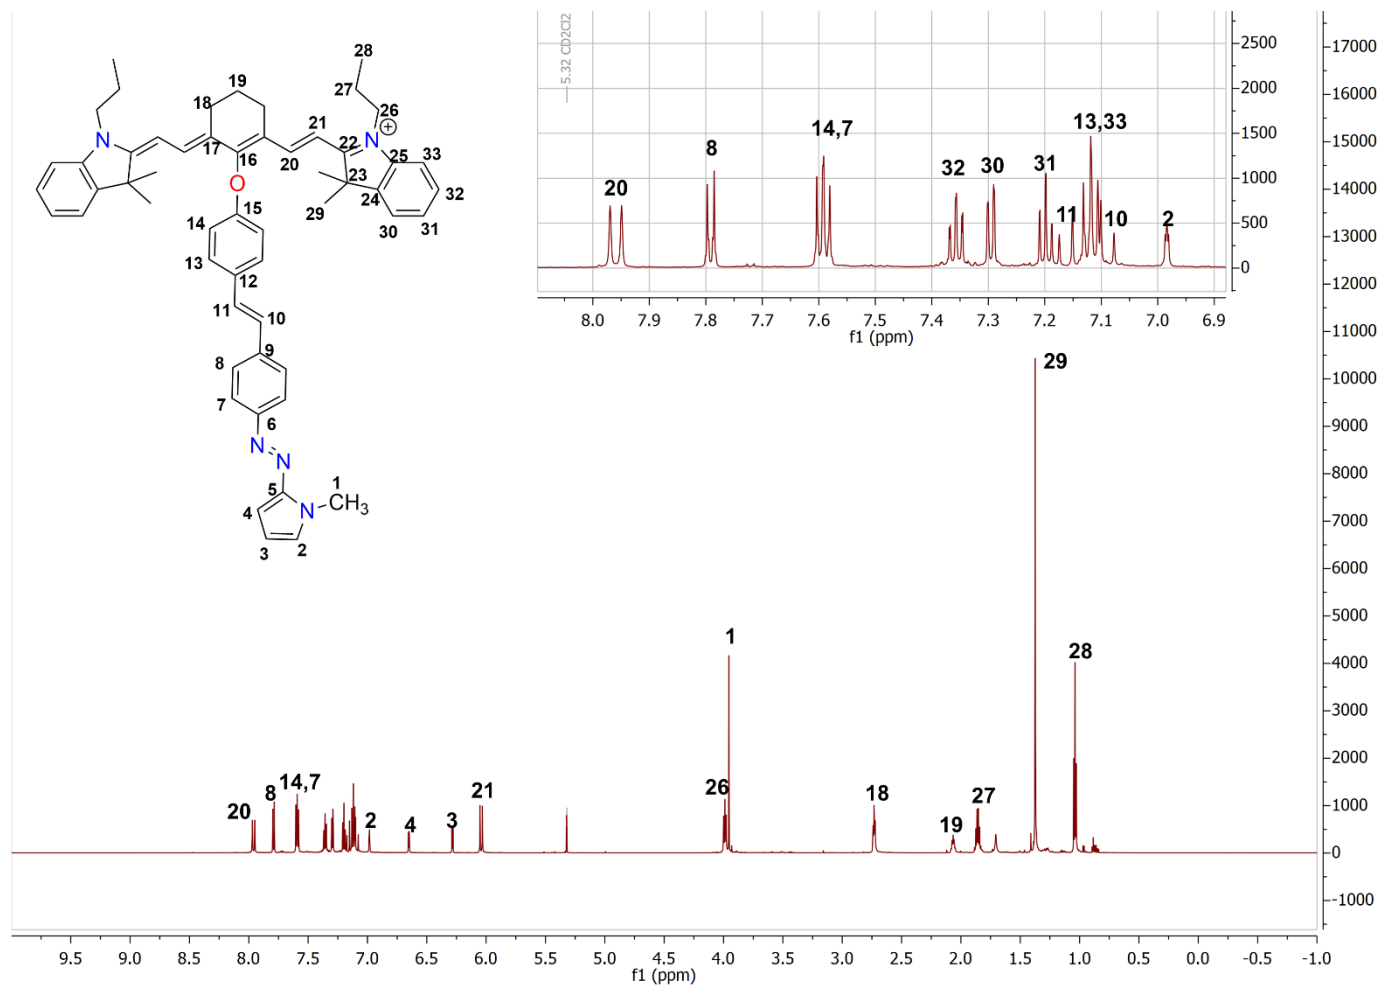

**Figure S5.** <sup>1</sup>H NMR (700MHz, CD<sub>2</sub>Cl<sub>2</sub>) spectrum of Cy-SAP: 2-((E)-2-((E)-3-((E)-2-(3,3-dimethyl-1-propylindolin-2-ylidene)ethylidene)-2-(4-((E)-4-((E)-(1-methyl-1H-pyrrol-2-yl)diazenyl)styryl)phenoxy)cyclohex-1-en-1-yl)vinyl)-3,3-dimethyl-1-propyl-3H-indol-1-ium iodide. – (2). <sup>1</sup>H and <sup>13</sup>C chemical shifts are based on 2D HSQC, HMBC and COSY NMR spectra. The inset shows an expanded view of signals crowded around 7.5 ppm.

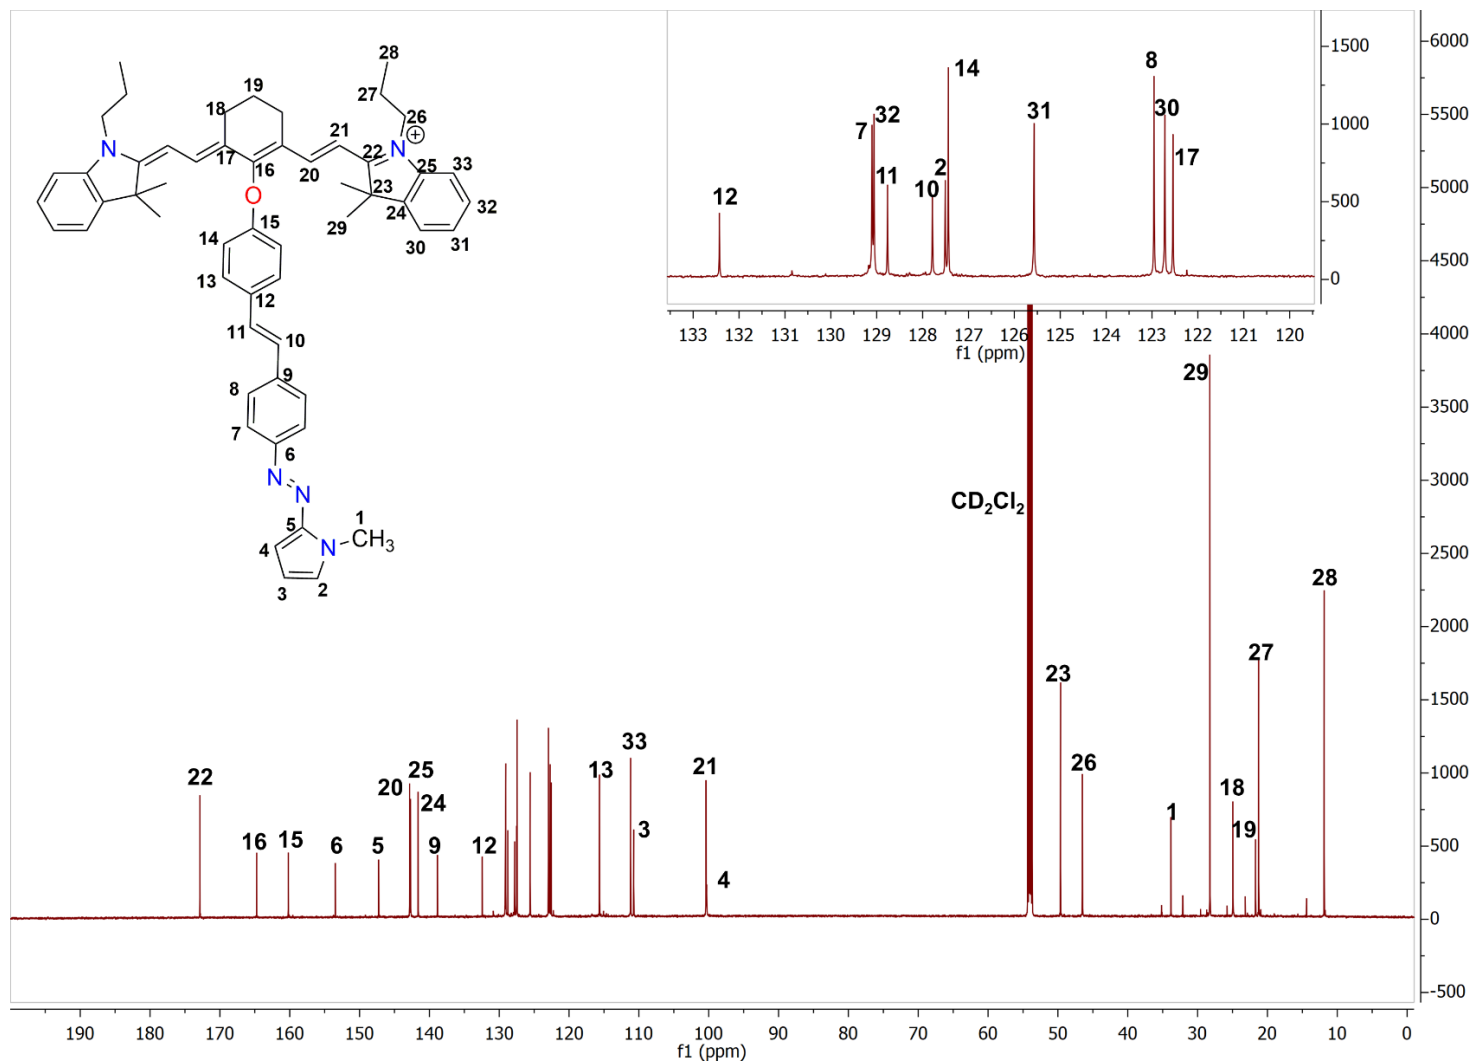

**Figure S6.** <sup>13</sup>C NMR (176 MHz, CD<sub>2</sub>Cl<sub>2</sub>) spectrum of Cy-SAP: 2-((E)-2-((E)-3-((E)-2-(3,3-dimethyl-1-propylindolin-2-ylidene)ethylidene)-2-(4-((E)-4-((E)-(1-methyl-1H-pyrrol-2-yl)diazanyl)styryl)phenoxy)cyclohex-1-en-1-yl)vinylyl)-3,3-dimethyl-1-propyl-3H-indol-1-ium iodide. – (2). The inset shows an expanded view of signals crowded around 126 ppm. <sup>1</sup>H and <sup>13</sup>C chemical shifts are based on 2D HSQC, HMBC and COSY NMR spectra.

## Steady State Spectroscopy from upper excited electronic states of the IR780 cyanine dye

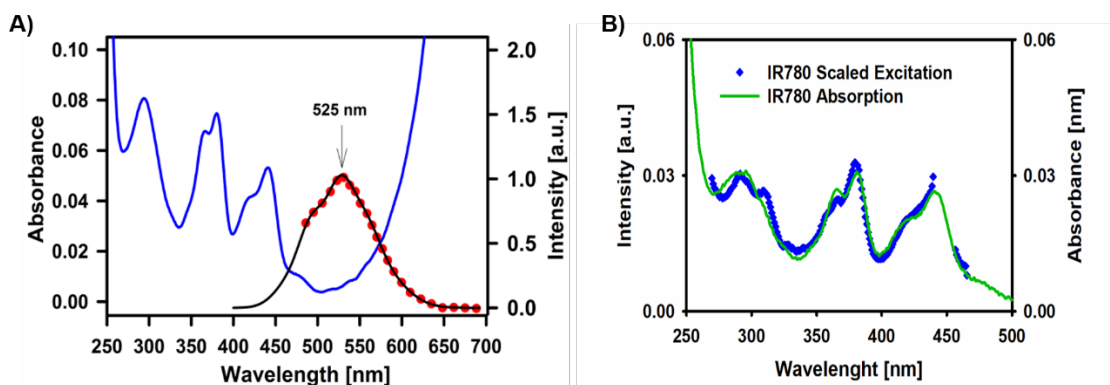

**Figure S7.** Steady state spectroscopy for the higher excited states ( $S_n$ ,  $n>1$ ) of the IR780 cyanine dye. A) Absorption spectrum (blue line). The corrected emission spectrum from the second excited singlet state is presented in red symbols. The black line corresponds to an estimation of the second singlet emission spectrum formed with a pair of log-normal functions. B) Absorption (green) and excitation (blue symbols) spectra of the IR780 cyanine in methylene chloride. The emission at 528 nm was monitored. All spectra were taken in acetonitrile. The missing blue symbols are due to the presence of a Raman band.

## Computational Chemistry Methods

In order to determine the energy transfer parameters involved in the photoactivation of the Cy-SAP system, we performed DFT calculations using the Gaussian09-E0.1 set of programs<sup>7</sup> for the SAP and IR-780 molecules. In particular, the directions of the corresponding transition dipole moments are crucial to estimate the energy transfer efficiency as described in the manuscript. The ground state geometry optimizations and frequencies were obtained using the PBE0 and M06 hybrid functionals and the 6-311++G(d,p) basis set. These are among the best general purpose functionals for large organic molecule excited state calculations.<sup>8-16</sup> Our main use of these results is the estimation of the relative direction between the transition moment vectors relevant in the indirect excitation of the actuator section (from the higher cyanine-localized state to the excited state localized in the stilbenyl-azo section). The transition dipole moment vectors are important parameters which determine the efficiency of energy transfer. The calculations were carried out in solution (acetonitrile) with the polarizable continuum model (PCM). The absence of imaginary frequencies in these calculations confirmed the global energy minimum of the ground state equilibrium geometry. The excitation energies were corrected by state-specific solvation of the vertical excitation states.

The ground state equilibrium geometries were optimized using the PBE0 (PBE1PBE) and M06 as functionals, along with the base set 6-311++G(d,p), using the PCM solvation model PCM for acetonitrile. The calculations obtained did not yield any imaginary frequencies. Later, the excitation energies carried out through TD-DFT calculations. Lastly, the excitation energies were corrected by means of calculations of the state-specific solvation of the vertical excitation. For the TD-DFT and TD-DFT calculations with state-specific correction, the same functionals, base set and solvation model were used. The input files shown below, correspond to the ground state equilibrium geometry optimization. The Z-matrix coordinates of the optimized geometries for SAP and IR-780 are included in a different section below.

**Gaussian input file example for the SAP molecule ground state equilibrium geometry optimization.**

```
%nprocshared=16
%mem=32gb
%chk=SAP.chk
#p pbe1pbe/6-311++g(d,p) opt=calcfreq scrf=(pcm,solvent=acetonitrile) nosymm int=grid=ultrafine iop(1/8=3) scf=xqc
density=current
```

SAP\_S0\_acetonitrile

```
0 1
[Z-matrix coordinates of the input structure]
```

**Gaussian input file for the SAP molecule to the vertical excitations calculation.**

```
%nprocshared=16
%mem=32gb
%oldchk=SAP.chk
%chk=TDSAP.chk
#p pbe1pbe/6-311++g(d,p) TD=(NStates=20,singlets,root=2) scrf=(pcm,solvent=acetonitrile) nosymm int=grid=ultrafine
iop(1/8=3) scf=xqc density=current geom=check guess=read
```

SAP\_TD\_acetonitrile

```
0 1
[No coordinates in Z-matrix because chosen the SAP.chk file to start the TD-DFT calculation using geom=check and
guess=read as keywords]
```

**Gaussian input file for the SAP molecule to TD-DFT state-specific solvation of the vertical excitation calculation.**

```
%nprocshared=16
%mem=32gb
%oldchk=SAP.chk
%chk=SAPSS.chk
#p pbe1pbe/6-311++g(d,p) scrf=(pcm,solvent=acetonitrile,read) nosymm int=grid=ultrafine iop(1/8=3) scf=xqc
density=current geom=check guess=read
```

SAP\_state\_specific\_acetonitrile\_01

```
0 1
```

NonEq=Write

```
--Link1--
%nprocshared=16
%mem=32gb
%chk=SAPSS.chk
#p pbe1pbe/6-311++g(d,p) scrf=(pcm,solvent=acetonitrile,ExternalIteration,Read) TD=(NStates=20,singlets,root=1) nosymm
int=grid=ultrafine iop(1/8=3) scf=xqc density=current geom=check guess=read
```

SAP\_state\_specific\_acetonitrile\_02

```
0 1
NonEq=read
```

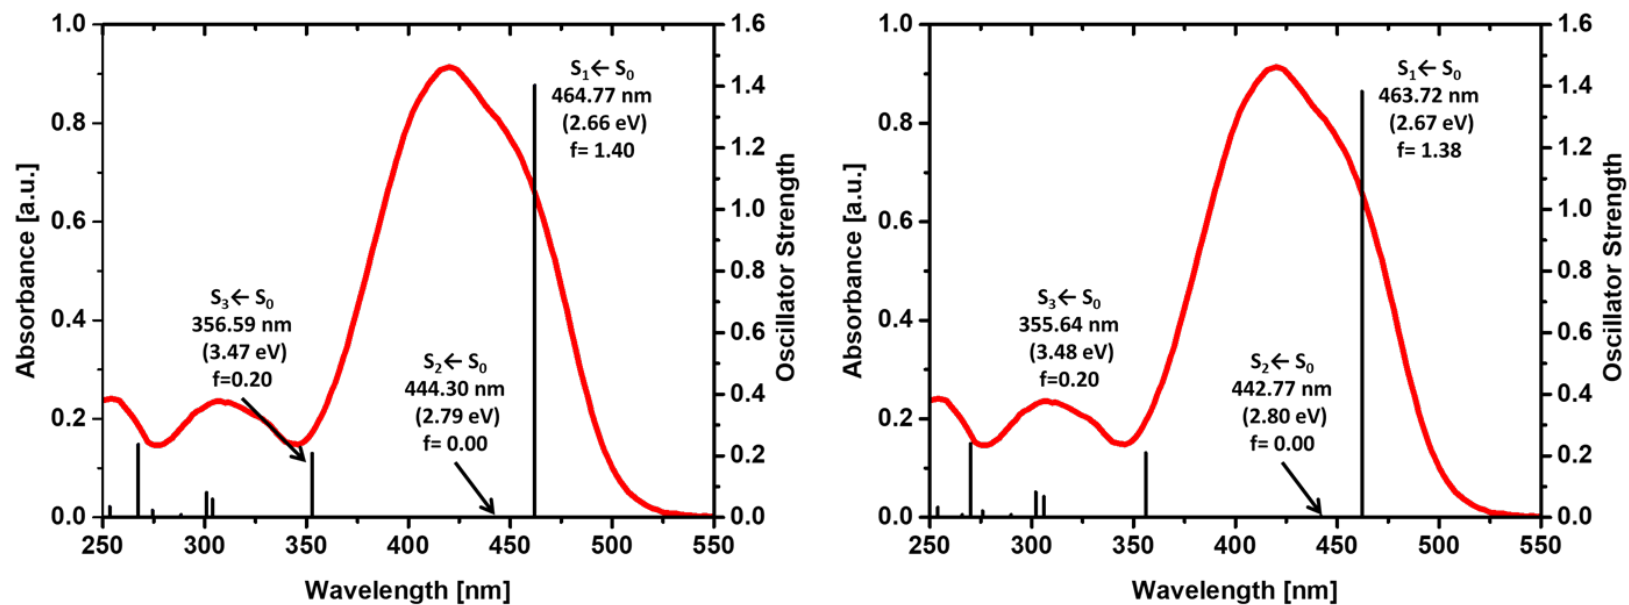

**Figure S8.** SAP Experimental absorption spectra (red line) comparison with the calculated vertical transitions (black lines) calculated using TD-DFT PBE0/6-311++G(d,p) (left) and M06/6-311G++(d,p) (right) with PCM as MeCN solvent model.

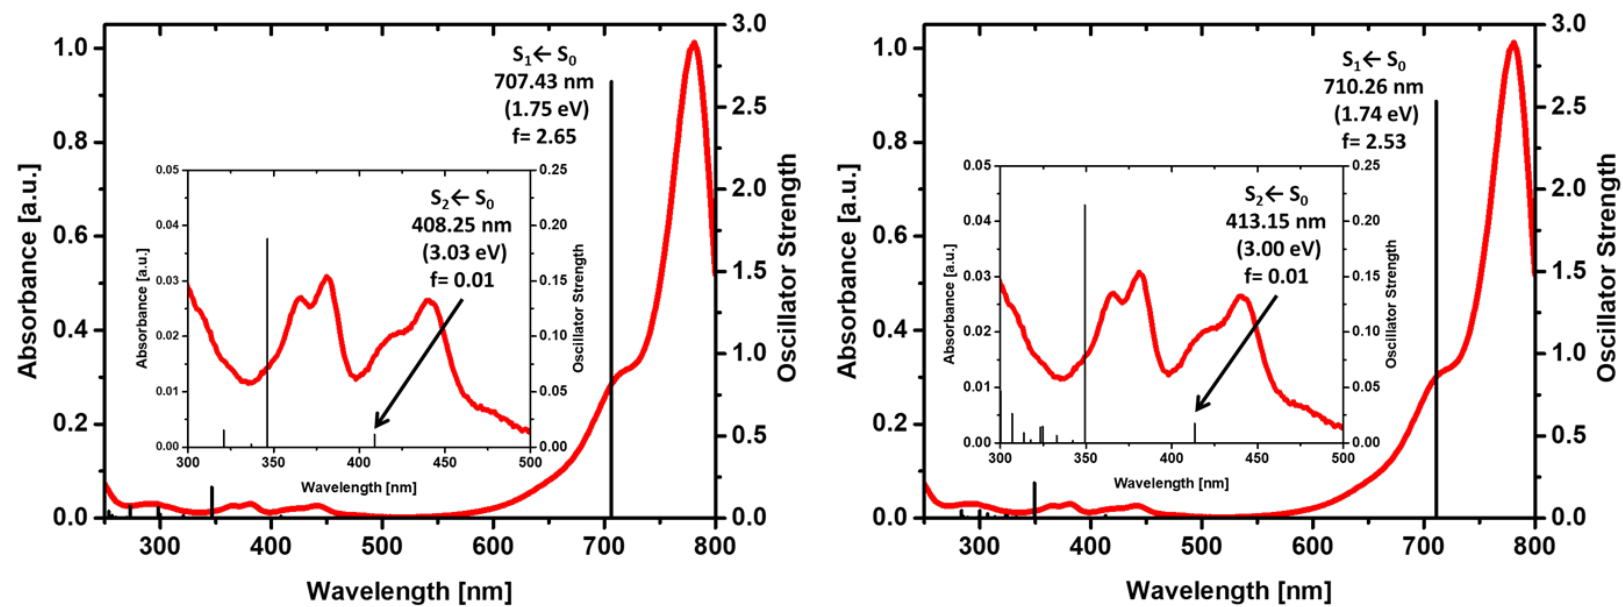

**Figure S9.** IR780 experimental absorption spectra (red lines) and comparison with the calculated vertical transitions (black lines) using TD-DFT PBE0/6-311++G(d,p) (left) and M06/6-311++G(d,p) (right) with PCM as the solvent model for acetonitrile. An expanded view of the spectra from 200 to 500 nm is included in the insets.

### Energy Transfer Rate Constant Calculation (Förster model)

The rate of transfer  $k_{trans}$  can be calculated using the equation S1 which considers a coulombic type interaction for the interchromophore coupling.

$$k_{trans} = \frac{9000 \ln(10) \kappa^2 \Phi_{f(D)} J}{128 \pi^5 N n^4 \tau R^6} \quad (S1)$$

Where  $\kappa^2$  is the orientation factor of the donor and acceptor transition dipole moments,  $\Phi_{f(D)}$  is the donor fluorescence quantum yield in the absence of any acceptor,  $J$  is the spectral overlap,  $N$  is Avogadro's number,  $n$  is the solvent's refractive index,  $\tau$  is the donor fluorescence lifetime and  $R$  is the donor-acceptor center-to-center distance of separation. The spectral overlap is:

$$J = \int_0^\infty \frac{f_s(\nu) \epsilon_A(\nu)}{\nu^4} d\nu \quad (S2)$$

where  $f_s(\nu)$  is the normalized spectral distribution of fluorescence intensity as a function of wavenumber,  $\epsilon_A(\nu)$  is the molar absorption coefficient of the acceptor as a function of wavenumber.

The Förster distance  $R_0$  which is a critical distance between the center of donor and acceptor where the transfer efficiency is 50% value is:

$$R_0^6 = \frac{9000 \ln(10) \kappa^2 \Phi_{f(D)} J}{128 \pi^5 N n^4} \quad (S3)$$

The Transfer efficiency,  $T$ , can be calculated using Equation S4.

$$T = \frac{R_0^6}{R^6 + R_0^6} \quad (S4)$$

The calculation of the Förster energy transfer parameters was performed using the program PhotochemCAD™.<sup>17</sup>

In the following pages we include three different ways to calculate the Förster efficiency. In all cases we use the S<sub>2</sub> emission spectrum of IR-780 but change the way we consider the acceptor chromophore absorption transitions. We include the calculations using the SAP absorption spectrum (Figure S11), the Cy-SAP absorption spectrum (Figure S12), and the Cy-SAP minus IR-780 absorption spectrum (Figure S13, also see Figure S10). All these different ways to estimate the overlap integral give similar results, with efficiencies from 75 to 81%. The manuscript refers to the calculation according to the overlap displayed in Figure S11 which considers the SAP absorption spectrum.



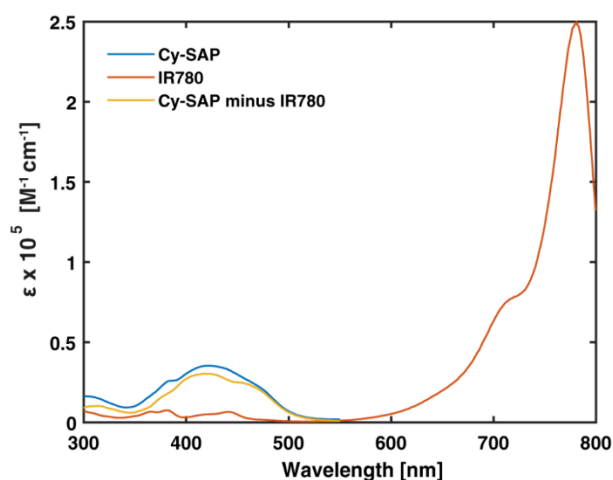

**Figure S10.** Comparison between the Cy -SAP and the IR780 absorption spectra. We also include the spectrum that results from the subtraction of the Cy-SAP spectrum minus IR780 absorption spectra. This spectrum is nearly identical to that of SAP. This comparison was made in order to show that the two chromophores maintain their spectroscopic properties in Cy-SAP.

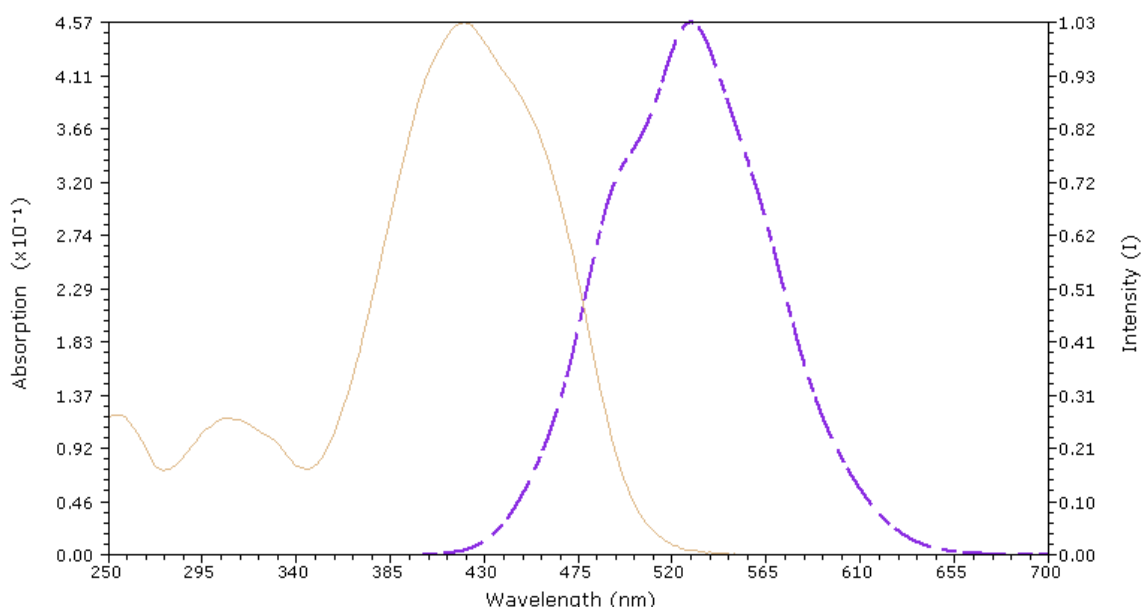

**Figure S11.** Overlap between absorption spectrum of SAP (orange line) and emission spectrum of the  $S_2$  state of IR780 (purple line). The latter spectrum was formed with two log-normal functions which were fitted to the experimental data as indicated in a previous figure.

**Table S1.** Results of the Förster energy transfer calculations in Cy-SAP using the orientation factors obtained with TD-DFT calculations, and the overlap in Figure S11. The interchromophore distance was 0.925 nm which corresponds to the center-to-center distance of the two chromophores from the respective optimized geometry. For reference we include the results from considering random relative orientations between the chromophores ( $\kappa^2 = 2/3$ ).

|                                             | $\kappa^2 = 2/3$      | PBE0 ( $\kappa^2 = 3.76$ ) | M06 ( $\kappa^2 = 3.73$ ) |
|---------------------------------------------|-----------------------|----------------------------|---------------------------|
| <b>J [ cm<sup>6</sup>mmol<sup>-1</sup>]</b> | $2.3 \times 10^{-14}$ | $2.3 \times 10^{-14}$      | $2.3 \times 10^{-14}$     |
| <b>Förster distance [Å]</b>                 | 8.3                   | 11.1                       | 11.1                      |
| <b>Transfer efficiency [%]</b>              | 34.7                  | 75.0                       | 74.8                      |
| <b>k<sub>trans</sub> [s<sup>-1</sup>]</b>   | $3.8 \times 10^{11}$  | $2.1 \times 10^{12}$       | $2.1 \times 10^{12}$      |
| <b>Dexter value [eV<sup>-1</sup>]</b>       | 0.116                 | 0.116                      | 0.116                     |

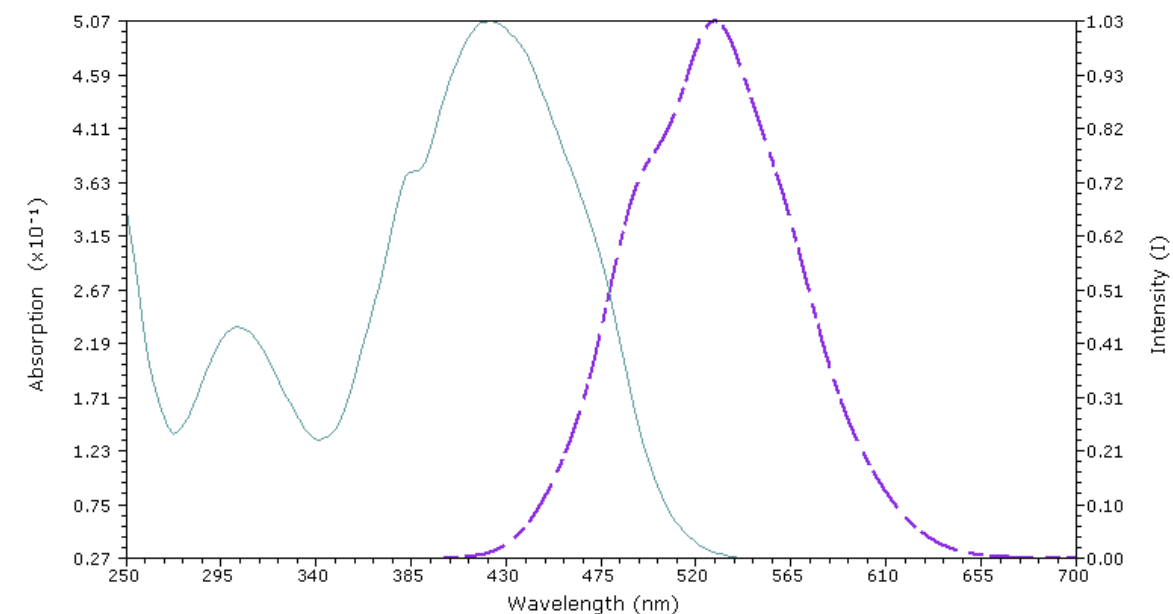

**Figure S12.** Overlap between absorption spectrum of Cy-SAP (blue line) and emission spectrum of  $S_2$  excited state of the IR780 (purple line).

**Table S2.** Results of Förster energy transfer calculations in Cy-SAP using orientation factors obtained with TD-DFT theory and the overlap in Figure S12. For reference we include the results from considering random relative orientations between the chromophores ( $\kappa^2 = 2/3$ ).

|                                             | $\kappa^2 = (2/3)$    | PBE0 ( $\kappa^2 = 3.76$ ) | M06 ( $\kappa^2 = 3.73$ ) |
|---------------------------------------------|-----------------------|----------------------------|---------------------------|
| <b>J [ cm<sup>6</sup>mmol<sup>-1</sup>]</b> | $3.1 \times 10^{-14}$ | $3.1 \times 10^{-14}$      | $3.1 \times 10^{-14}$     |
| <b>Förster distance [Å]</b>                 | 8.8                   | 11.8                       | 11.7                      |
| <b>Transfer efficiency [%]</b>              | 41.6                  | 80.1                       | 80.0                      |
| <b>k<sub>trans</sub> [s<sup>-1</sup>]</b>   | $5.1 \times 10^{11}$  | $2.9 \times 10^{12}$       | $2.9 \times 10^{12}$      |
| <b>Dexter value [eV<sup>-1</sup>]</b>       | 0.123                 | 0.123                      | 0.123                     |

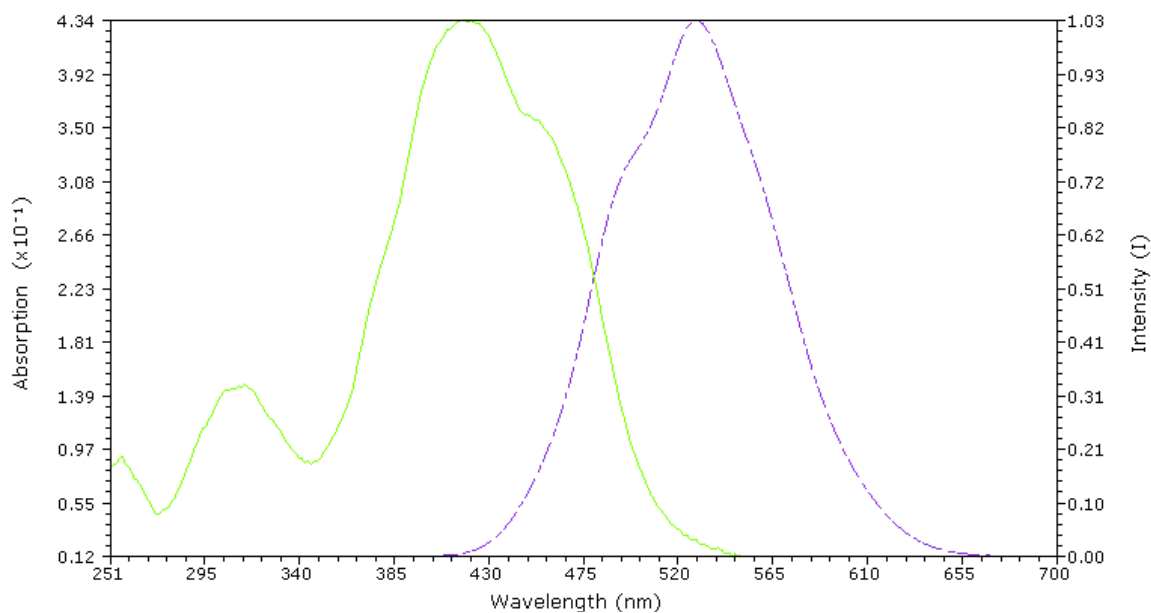

**Figure S13.** Overlap between absorption spectrum of Cy-SAP minus IR780 (green line) and emission spectrum of the  $S_2$  excited state of the IR780 (purple line).

**Table S3.** Results of Förster energy transfer calculation in Cy-SAP using orientation factors obtained with TD-DFT theory and the overlap in Figure S13. For reference we include the results from considering random relative orientations between the chromophores ( $\kappa^2 = 2/3$ ).

|                                             | $\kappa^2 = (2/3)$    | PBE0 ( $\kappa^2 = 3.76$ ) | M06 ( $\kappa^2 = 3.73$ ) |
|---------------------------------------------|-----------------------|----------------------------|---------------------------|
| <b>J [ cm<sup>6</sup>mmol<sup>-1</sup>]</b> | $3.1 \times 10^{-14}$ | $3.1 \times 10^{-14}$      | $3.1 \times 10^{-14}$     |
| <b>Förster distance [Å]</b>                 | 8.8                   | 11.7                       | 11.7                      |
| <b>Transfer efficiency [%]</b>              | 41.7                  | 80.1                       | 80.0                      |
| <b>k<sub>trans</sub> [s<sup>-1</sup>]</b>   | $5.1 \times 10^{11}$  | $2.9 \times 10^{12}$       | $2.9 \times 10^{12}$      |
| <b>Dexter value [eV<sup>-1</sup>]</b>       | 0.156                 | 0.156                      | 0.156                     |

### E-Z Photo-transformation of the Actuator (SAP alone)

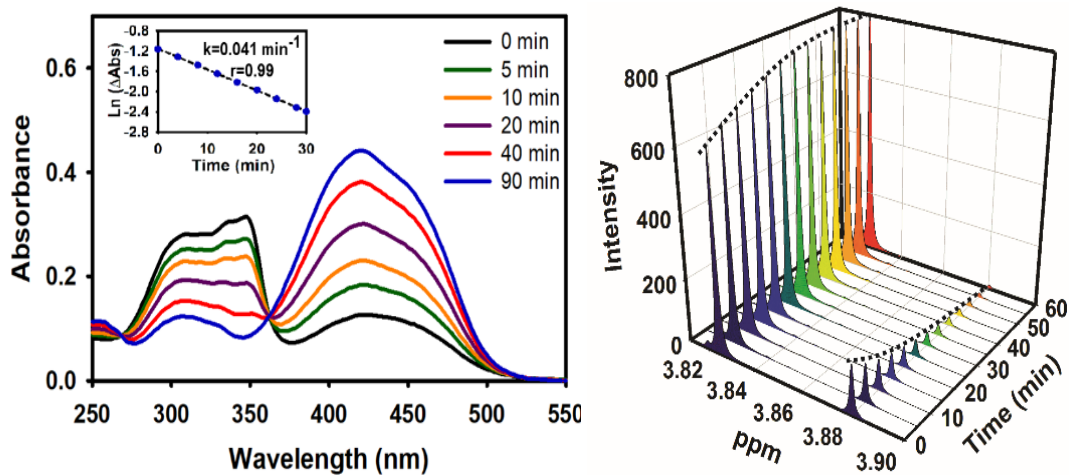

**Figure S14.** Evidence of the phototransformation of the SAP system and the return to the thermally stable isomer (E). On the left we show the spectral evolution associated with the Z-E thermal back-transformation. On the right we include the proton NMR spectrum as a function of time for the Z-E thermal back-transformation. The signal at 3.88 ppm corresponds to the N-methyl proton of the Z isomer and the signal at 3.825 ppm, to the same proton in the E-isomer.

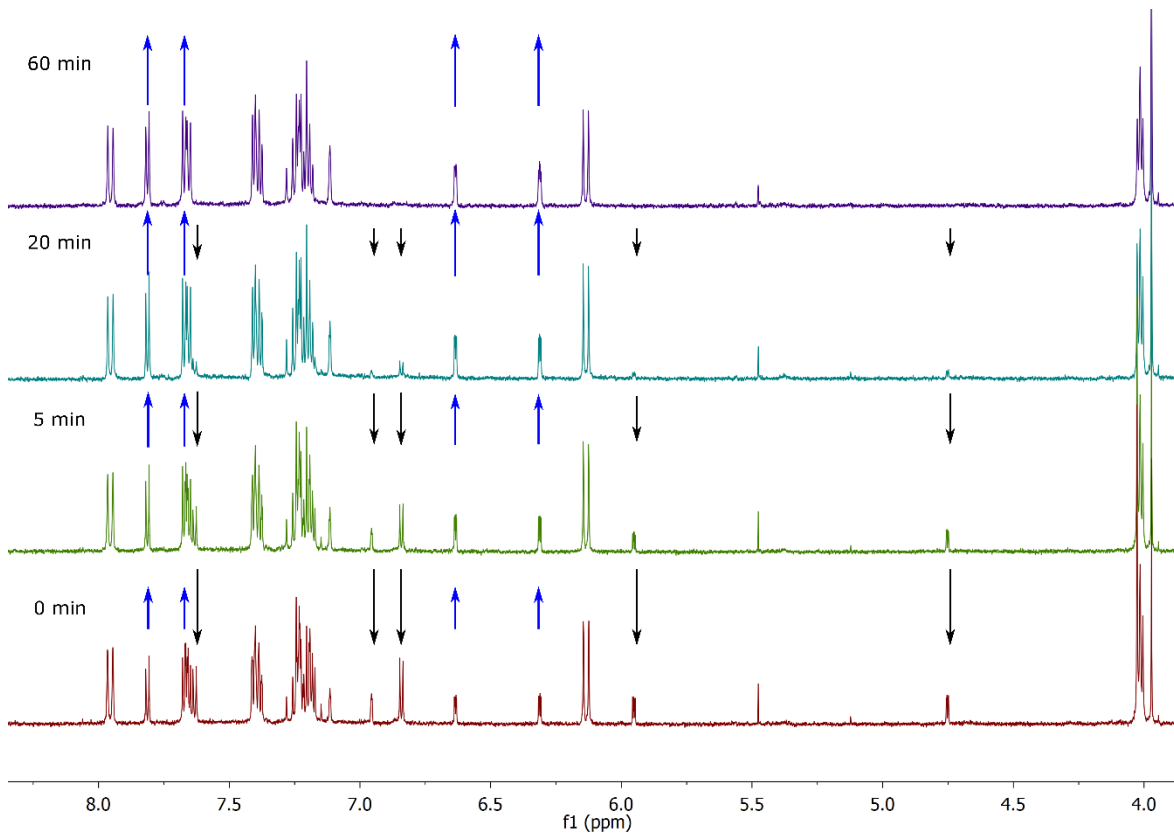

**Figure S15.**  $^1\text{H}$  Spectral evolution of the Z $\rightarrow$ E thermal back-isomerization of Cy-SAP. The complete disappearance of the Z isomer is more clearly observed in the full spectra. Important signals are marked with arrows next to the signals.

### Estimation of the absorption spectra of the E-SAP and E-Cy-SAP isomers from the photostationary spectra

The method used to obtain an estimation of the absorption spectra for each isomer is based on the one proposed by Calbo and coworkers.<sup>18</sup> Starting from the Lambert-Beer law for the photostationary state:

$$A_{PSS}(\lambda) = l(\epsilon_E(\lambda)C_E(PSS) + \epsilon_Z(\lambda)C_Z(PSS)) \quad (S5)$$

Where  $A_{PSS}(\lambda)$  is the total absorbance in the photostationary state as a function of the wavelength,  $l$  is the path length (in  $\text{cm}^{-1}$ ),  $\epsilon_E(\lambda)$  and  $\epsilon_Z(\lambda)$  (in  $\text{L mol}^{-1} \text{cm}^{-1}$ ) are the molar extinction coefficients as a function of wavelength of the *trans*- and *cis*-isomers respectively.

Rearranging for  $\epsilon_Z(\lambda)$  from Equation S5:

$$\epsilon_Z(\lambda) = \frac{\frac{A_{PSS}(\lambda)}{l} - \epsilon_E(\lambda)C_E(PSS)}{C_Z(PSS)} \quad (S6)$$

It is known that the total concentration  $C_0$  remains constant throughout the isomerization process and is also the sum of the concentration of both isomers.

$$C_0 = C_E(PSS) + C_Z(PSS) \quad (S7)$$

The concentration of *trans*- and *cis*- isomers in the photostationary state was estimated using a specific wavelength where the *trans* isomer is the main absorbent.

$$C_E(PSS) = f \left( \frac{A_{PSS}(\lambda_{specific})}{\epsilon_E(\lambda_{specific})} \right) \quad (S8)$$

$$C_Z(PSS) = \frac{A_{t=0}(\lambda_{specific})}{\epsilon_E(\lambda_{specific})} - C_E(PSS) \quad (S9)$$

where  $A(\lambda_{specific})$  is the absorbance before irradiation in a specific wavelength where the absorbance of the *cis*- isomer is minimal,  $A_{PSS}(\lambda_{specific})$  is the absorbance after irradiation in the photostationary state at the same wavelength and  $f$  is a relation between the *trans*- and *cis*- isomer's absorbance at the  $\lambda_{specific}$ .

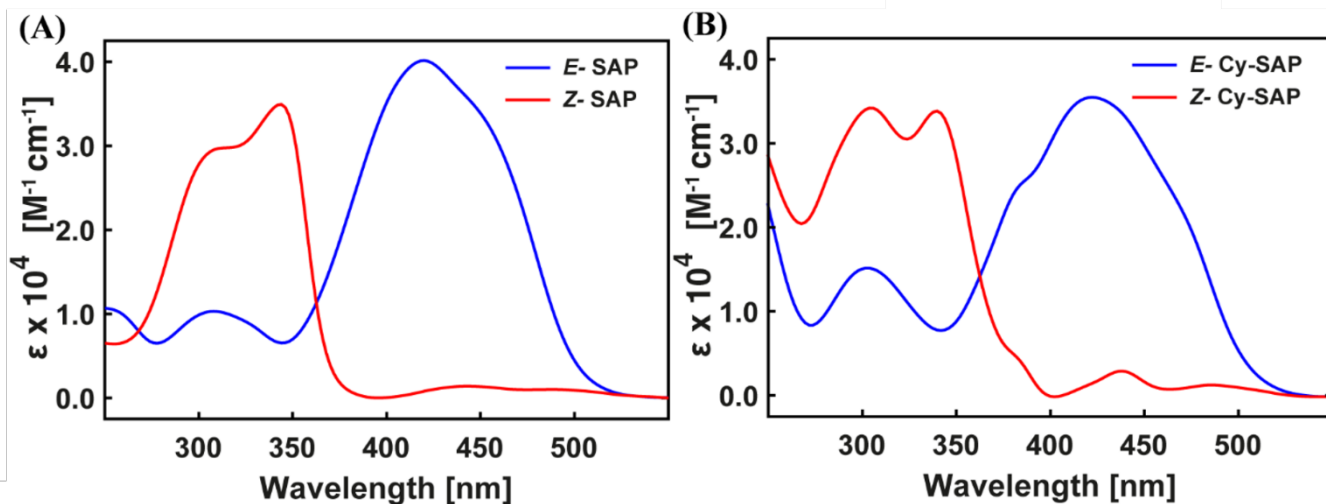

Figure S16. (A) Absorption spectrum of (E) SAP and (Z) SAP. (B) Absorption spectrum of (E) Cy-SAP and of (Z) Cy-SAP

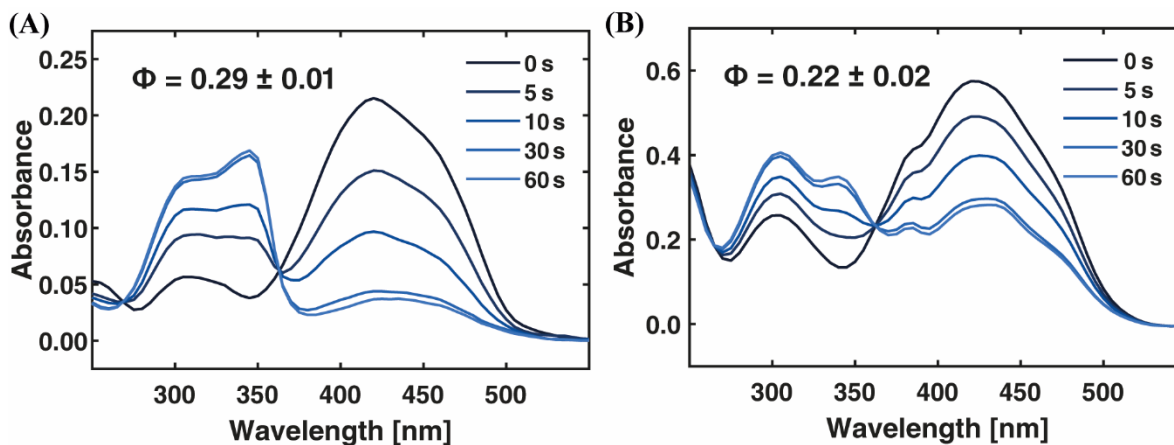

Figure S17. Spectra showing the data used to calculate the photoisomerization quantum yield for monophotonic excitation in the formation of the photostationary state of SAP (A) and Cy-SAP (B) irradiating with 405 nm 3 mW laser. The thermal back isomerization is also included for both systems.

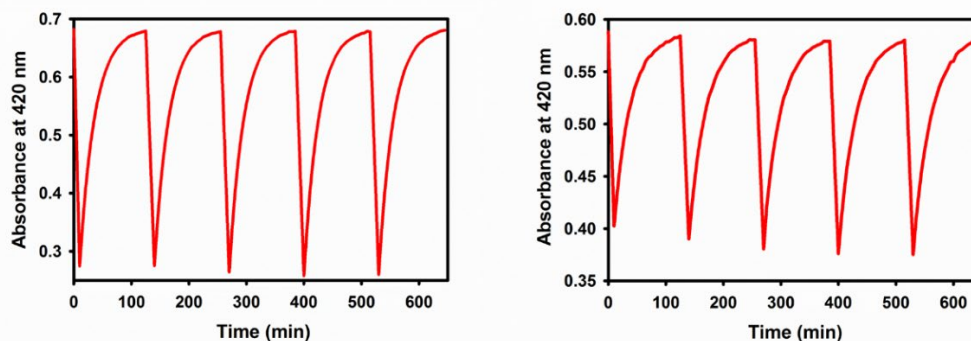

Figure S18. Photoisomerization-cycles of SAP system (left) and Cy-SAP system (right). Both experiments were made in acetonitrile

## Non-linear NIR light Excitation and Photoisomerization of Cy-SAP

Non-linear photocontrol of the Cy-SAP system through energy transfer from the cyaninic antenna to the azo linkage effector was demonstrated with the following experiment. Cy-SAP was used after recrystallization from DCM/ether. Acetonitrile (HPLC) was used for the measurements. The solutions were used immediately after preparation. The experimental setup is shown in Scheme S1.

The same laser system as the fluorescence up-conversion experiments was used. The laser system produces pulses of 100–200 fs, 860 nm at 1kHz repetition rate. The output beam power was adjusted through a neutral density filter (NDF) and focused with a lens (Thorlabs,  $f=1000$  mm) into a 0.5 cm quartz cell containing 400 mL of the solutions (stirring, in darkness and sealed). The isomerization from the azo moiety is monitored by taking UV-Vis spectra prior and after NIR irradiation.

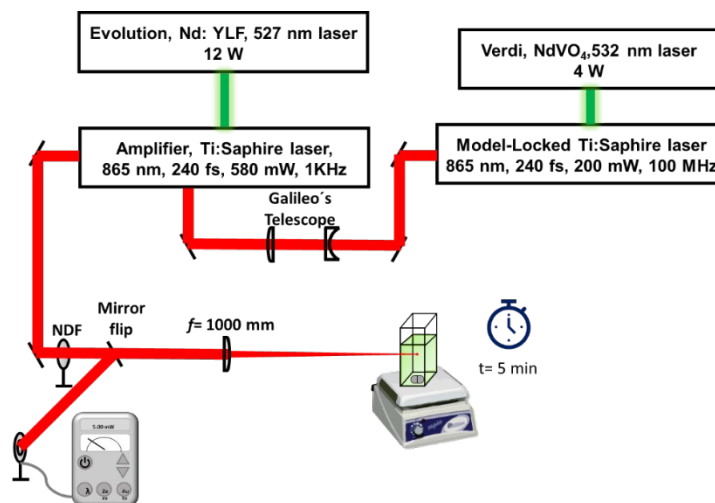

**Scheme S1.** Experimental setup for non-linear photoisomerization of Cy-SAP.

In order to determine the intensity levels where no Cy-SAP photodegradation is observed from multiphoton ionization and other irreversible multiphoton events, the samples were irradiated for 5 minutes at 3–20 mW average powers ( $2 \times 10^{10}$ – $2 \times 10^{11}$  W cm<sup>-2</sup> peak irradiance) with the pulsed NIR source tuned to 860 nm. The spectra in Figure S19 show there is no change at wavelengths above 600 nm when exciting the sample at powers up to 10 mW, indicating no cyanine decomposition. When working in these powers, the only change observed is the one due to the isomerization of the azo linkage as observed in the 250–500 nm region. Evidence of photodecomposition is observed only when irradiating at average powers larger than or equal to 20 mW. At average powers larger than this, the cyaninic absorption above 600 nm drops by a small percentage, suggesting some decomposition of the antenna due to the large irradiation intensity. Furthermore, at these larger intensities, the isomerization around the azo moiety is not observed given there is no change in absorption around 420 nm, further indicating non-linear optical decomposition at these higher intensities, most likely due to multiphoton ionization.

Although a small yield dissociation of the ether linked group has been observed in a related system previously by our group upon non-linear excitation (a different system, designed for such purposes),<sup>19</sup> no evidence of this was seen for the Cy-SAP system. For the system of ref. 17, the meso-attached group was specifically designed for homolytic dissociation, which is achieved in a small yield of  $2 \times 10^{-3}$  per excitation event (which is appropriate for the application of that system). In fact, in ref. 17 we included an example of a different attached meso substituent which does not undergo dissociation, which shows that meso-group photodissociation is not a general feature in this kind of molecule.

Further evidence that the Cy-SAP molecule does not undergo photo-destruction at the  $2 \times 10^{10}$ – $2 \times 10^{11}$  W cm<sup>-2</sup> intensity levels comes from the observation that when the sample is allowed to rest at room temperature after irradiation, there is a full recovery to the initial state after with a clear isosbestic point at 365 nm (Figure S25). Moreover, if the dissociation was to occur, the band at 425 nm would show changes in shape, absorbance and position. It should be noticed that the first band of the stilbenylazopyrrole unit in the phenol form has a more square-like form with a larger absorption coefficient. The differences in these bands between SAP and Cy-SAP is highlighted in Figure S26.

The quadratic dependence of the azo-linkage isomerization as a function of irradiation power was tested using the same setup in a power range where no degradation is observed (2–7 mW or  $2$ – $5 \times 10^{10}$  W cm<sup>-2</sup> peak irradiance).

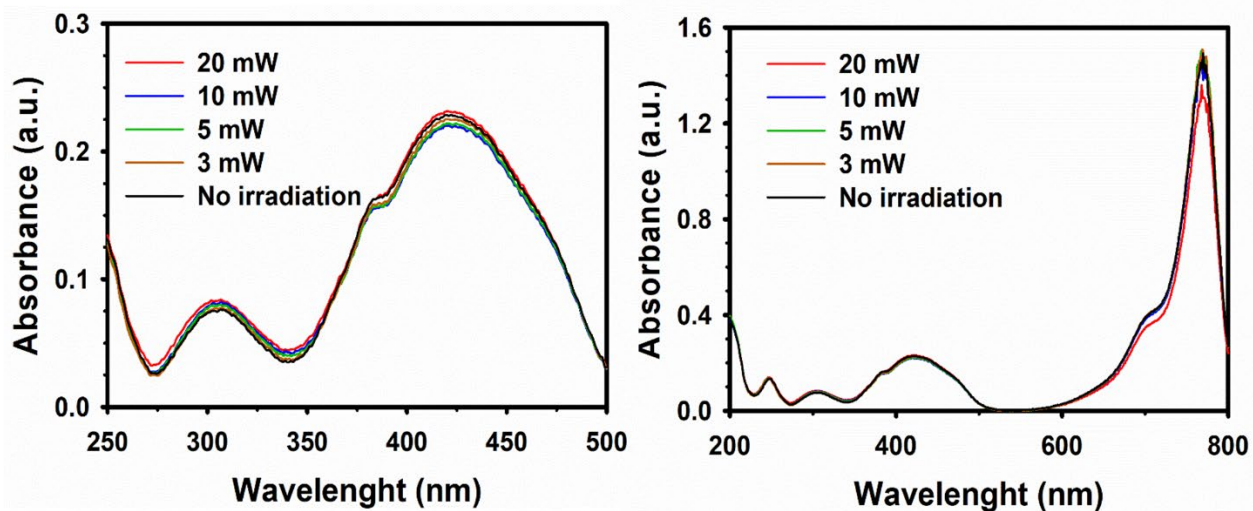

**Figure S19.** Photodecomposition intensity threshold. The spectra were taken after NIR irradiation and compared to the spectrum prior to irradiation. Right: The full spectral window shows no decomposition at intensities up to 10 mW. Left: Close up of the 250-500 nm spectral region, different behavior is seen at 20 mW irradiation power.

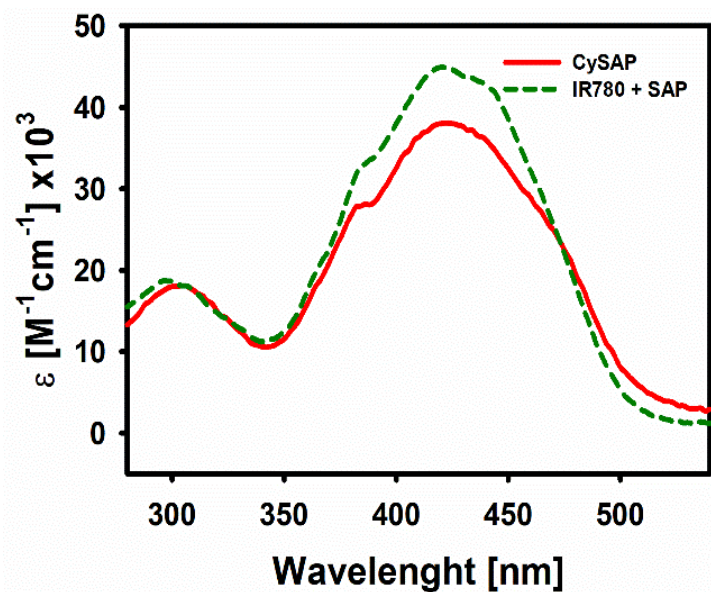

**Figure S20.** Absorption spectrum of Cy-SAP (red line) and for comparison, the sum of the absorption spectra of SAP and IR780 focusing in the 300-500 nm spectral range.



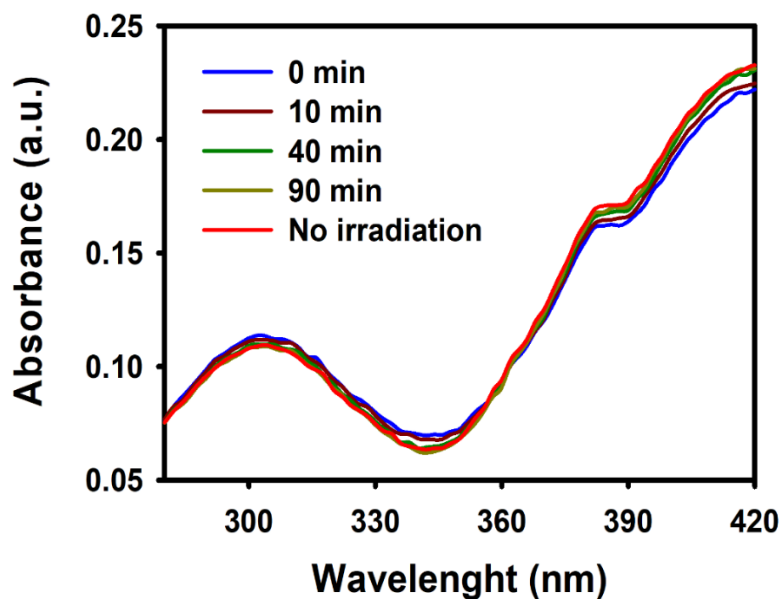

**Figure S21.** Cy-SAP thermal back-isomerization (Z→E) after two-photon excitation at 860 nm. A clear isosbestic point is seen at 370 nm. Full relaxation to the original spectrum is seen. The two-photon induced reaction takes place in the center of a 3 ml sample cell so that the spectra can be acquired in a UV-Vis spectrophotometer. It should be noticed that the transformation occurs in a small volume of the order of a few cubic microns, but the spectra are representative of the mixed 3 ml sample, therefore, the net transformation in the full cell's volume is small despite the fact that the phenomena occurs in a localized fashion in the center of the sample (where the local concentration for the E-Z isomerization by two photon absorption can be much higher).

### Time-resolved Fluorescence Spectroscopy

**Table S4.** Parameters for the Fluorescence Decay of the S<sub>2</sub> state of IR780 in Ethanol Solutions.

| $\lambda_{\text{fluo}}$ [nm] | $\tau_1$ [fs][ps] | $\tau_1$ [%] | $\tau_2$ [ps] | $\alpha_2$ [%] |
|------------------------------|-------------------|--------------|---------------|----------------|
| 480                          | 0.18±0.1          | 88.2         | 1.45±0.2      | 11.8           |
| 500                          | 0.21±0.1          | 83.3         | 1.45±0.2      | 16.7           |
| 520                          | 0.26±0.1          | 74.0         | 1.45±0.2      | 26.0           |
| 530                          | 0.23±0.1          | 72.1         | 1.45±0.2      | 27.9           |
| 540                          | 0.22±0.1          | 63.0         | 1.45±0.2      | 37.0           |
| 560                          | 0.21±0.1          | 68.7         | 1.45±0.2      | 31.3           |

$\lambda_{\text{exc}} = 860$  nm. IRF ~200 fs.

**Table S5.** Parameters for the Fluorescence Decay of the S<sub>2</sub> state of SAP and Cy-SAP in Acetonitrile Solution.

| $\lambda_{\text{fluo}}$ [nm] | $\tau_{\text{SAP}}$ [fs] | $\tau_{\text{Cy-SAP}}$ [fs] |
|------------------------------|--------------------------|-----------------------------|
| 475                          | 200 ± 100                | 170 ± 20                    |
| 500                          | 240 ± 60                 | 200 ± 20                    |
| 525                          | 260 ± 30                 | 170 ± 20                    |
| 550                          | 260 ± 10                 | 180 ± 10                    |
| 575                          | 300 ± 20                 | 190 ± 10                    |
| 600                          | 300 ± 20                 | 180 ± 20                    |
| 625                          | -----                    | 200 ± 10                    |

$\lambda_{\text{exc}} = 860$  nm. IRF ~300 fs.

## Anisotropy and Fluorescence Up-Conversion Experiments

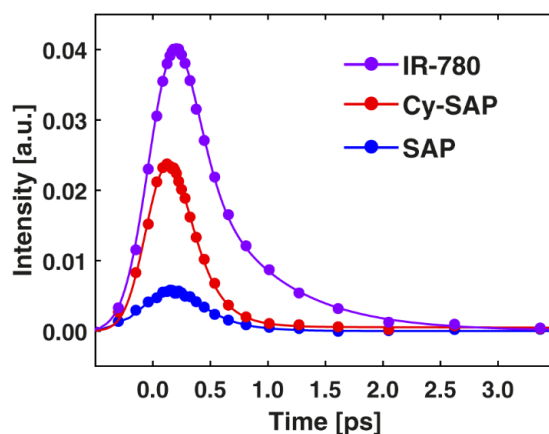

**Figure S22.** Comparison of absolute fluorescence intensities between SAP IR-780 and Cy-SAP. The detection and excitation wavelengths were 500 nm and 860 nm (two photon) respectively. The IR-780 were taken in a back-to-back fashion. The up-conversion experiments for SAP required an increase in the solution concentration and a two-fold increase in the pulse energy due to its reduced two-photon absorption cross section.

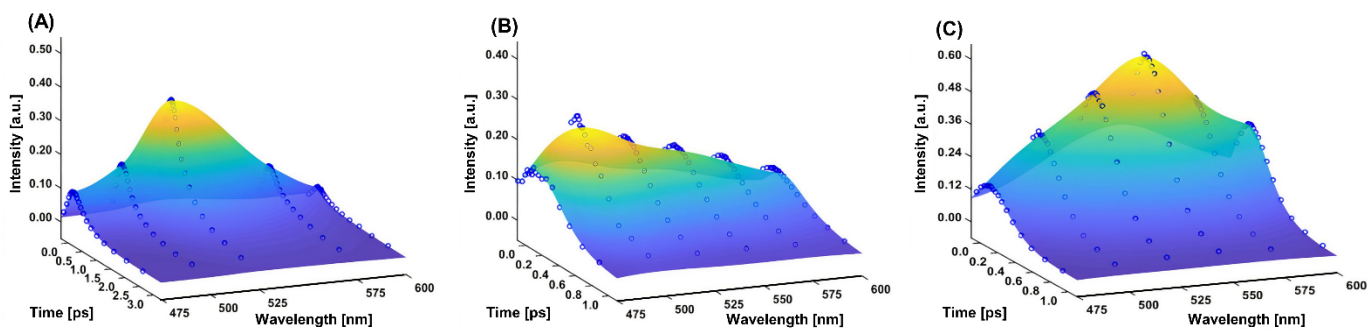

**Figure S23.** Time resolved emission spectra from (A) IR-780 and (B) SAP and (C) Cy-SAP. The emission is produced by two-photon 860 nm excitation. The solvent in all cases was methanol. The symbols indicate the experimental up-conversion signals and the coloured surfaces were interpolated from these data.

**Kinetic Scheme for the Antenna-Actuator system (Cy-SAP):**

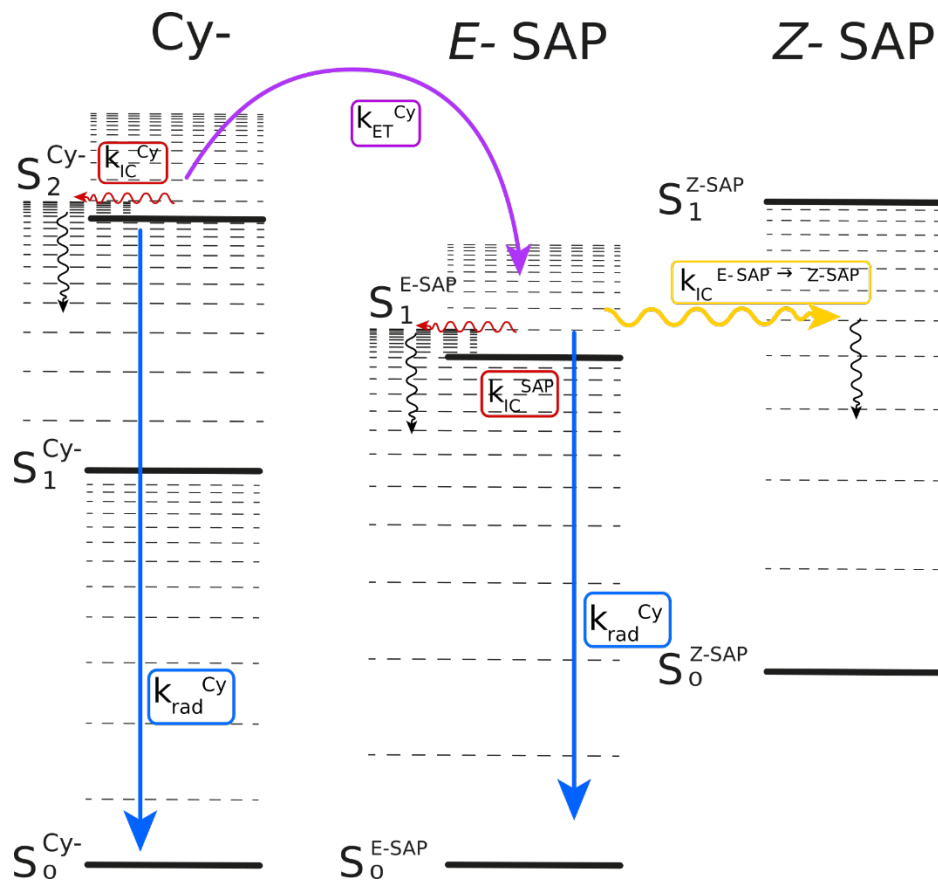

**Scheme S2.** Kinetic scheme of the system Antenna-Actuator (Cy-SAP).

Starting with the population of the second singlet excited state located at the cyanine section ( $S_2^{Cy}$ ) by two-photon absorption, the system can evolve through energy transfer to form the first singlet excited state of the actuator section: **(E) SAP** ( $S_1^{E-SAP}$ ). This population can then undergo isomerization to form the **Z** isomer after internal conversion to the ground state potential energy surface. The energy transfer channel exists in kinetic competition with internal conversion within the states localized in the cyanine section. The radiative channels are quite minor but can be used to follow the population of the excited states.

For  $S_2^{Cy}$  the elemental processes are:

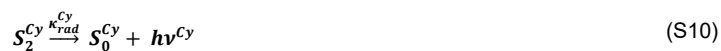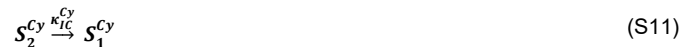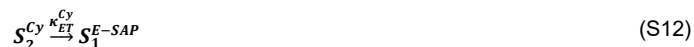

Where (S10) corresponds to the radiative decay, (S11) to internal conversion to the first cyanine-localized excited state, and (S12) to the energy transfer channel.

For  $S_1^{E-SAP}$  the processes are:

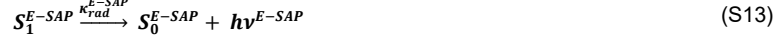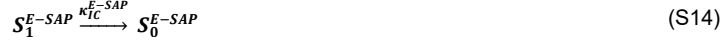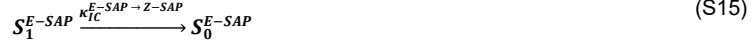

Where the channel in (S13) is the emission decay from  $S_1^{E-SAP}$  (radiative channels are of course small in yield but were used to monitor the kinetics). The channels in (S14) and (S15) correspond to the return to the electronic ground state leading to each isomer respectively.

We can write the kinetic equations for the concentration of  $S_2^{Cy}$  as a function of time  $[S_2^{Cy}(t)]$  and the concentration of  $S_1^{E-SAP}$  as a function of time  $[S_1^{E-SAP}(t)]$ , which are the two bright states of the system at the detection wavelengths.

$$-\frac{d}{dt}[S_2^{Cy}(t)] = [S_2^{Cy}(t)](\kappa_{rad}^{Cy} + \kappa_{IC}^{Cy} + \kappa_{ET}^{Cy}) \quad (S16)$$

$$-\frac{d}{dt}[S_1^{E-SAP}(t)] = [S_1^{E-SAP}(t)](\kappa_{rad}^{E-SAP} + \kappa_{IC}^{E-SAP} + \kappa_{IC}^{E-SAP \rightarrow Z-SAP}) - [S_2^{Cy}(t)](\kappa_{ET}^{Cy}) \quad (S17)$$

The last term in equation (S17) corresponds to the formation channel of  $S_1^{E-SAP}$  through energy transfer. Identifying  $\kappa_{Total}^{Cy}$  as the sum of the Cy-localized  $S_2$  decay constants and  $\kappa_{Total}^{E-SAP}$  as the sum of SAP (E)  $S_1$  decay constants, equations (S16) and (S17) are:

$$-\frac{d}{dt}[S_2^{Cy}(t)] = [S_2^{Cy}(t)]\kappa_{Total}^{Cy} \quad (S18)$$

$$-\frac{d}{dt}[S_1^{E-SAP}(t)] = [S_1^{E-SAP}(t)]\kappa_{Total}^{E-SAP} - [S_2^{Cy}(t)]\kappa_{ET}^{Cy} \quad (S19)$$

Equation (S18) corresponds to a first-order reaction, with solution:

$$[S_2^{Cy}(t)] = [S_2^{Cy}(0)]e^{-(\kappa_{Total}^{Cy})t} \quad (S20)$$

Substituting the previous equation, in the differential equation of  $S_1^{E-SAP}$  (equation S19).

$$-\frac{d}{dt}[S_1^{E-SAP}(t)] = [S_1^{E-SAP}(t)]\kappa_{Total}^{E-SAP} - \kappa_{ET}^{Cy}[S_2^{Cy}(0)]e^{-(\kappa_{Total}^{Cy})t} \quad (S21)$$

Gives the following solution where  $[S_1^{E-SAP}(t=0)] = 0$ .

$$[S_1^{E-SAP}(t)] = \frac{\kappa_{ET}^{Cy}}{\kappa_{Total}^{E-SAP} - \kappa_{Total}^{Cy}} [S_2^{Cy}(0)] (e^{-(\kappa_{Total}^{Cy})t} - e^{-(\kappa_{Total}^{E-SAP})t}) \quad (S22)$$

Defining:

$$\kappa^{E-SAP} = \frac{\kappa_{ET}^{Cy}}{\kappa_{Total}^{E-SAP} - \kappa_{Total}^{Cy}} \quad (S23)$$

Equation (S22) can be written as follows.

$$[S_1^{E-SAP}(t)] = \kappa^{E-SAP} [S_2^{Cy}(0)] (e^{-(\kappa_{Total}^{Cy})t} - e^{-(\kappa_{Total}^{E-SAP})t}) \quad (S24)$$

From the up-conversion experiments, the total decay rate constants for Cy  $S_2$  and SAP  $S_1$  are ( $\kappa_{Total}^{Cy} \approx 6 \times 10^{12} [s^{-1}]$ ), ( $\kappa_{Total}^{E-SAP} \approx 4 \times 10^{12} [s^{-1}]$ ). From the simple Förster model, the rate constant for energy transfer was estimated above to be approximately ( $\kappa_{ET}^{Cy} \approx 3 \times 10^{12} [s^{-1}]$ ).

With these considerations  $[S_2^{Cy}(t)]$  and  $[S_1^{E-SAP}(t)]$  evolve as follows:

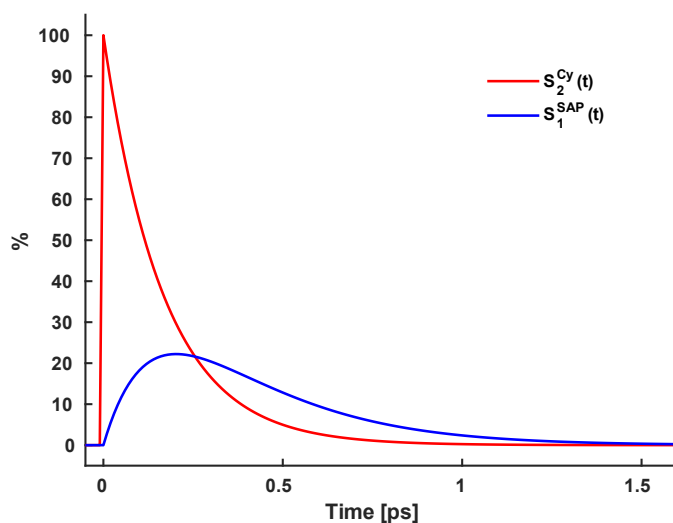

**Figure S24.** Concentration [%] as a function of time for both emissive states  $S_2^{Cy}$  (red) and  $S_1^{E-SAP}$  (blue).

### Fluorescence signals

The fluorescence signal as a function of time is proportional to the number of photons being emitted per unit time from the sample by both states since both emit in the region where the fluorescence was detected (475 to 600 nm, see the manuscript):  $h\nu^{Cy}(t)$  and  $h\nu^{E-SAP}(t)$ .

The kinetic equations of these processes are:

$$\frac{d}{dt}[h\nu^{Cy}(t)] = [S_2^{Cy}(t)] \kappa_{rad}^{Cy} \quad (S25)$$

$$\frac{d}{dt}[h\nu^{E-SAP}(t)] = [S_1^{E-SAP}(t)] \kappa_{rad}^{E-SAP} \quad (S26)$$

The total fluorescence intensity is the sum of the fluorescence intensity of both states  $S_2^{Cy}(t)$  and  $S_1^{E-SAP}(t)$ , therefore the total intensity as a function of time is:

$$I_{fluo}(t) \approx \kappa_{rad}^{Cy} e^{-(\kappa_{total}^{Cy})t} + \kappa_{rad}^{E-SAP} \kappa^{E-SAP} \left( e^{-(\kappa_{total}^{Cy})t} - e^{-(\kappa_{total}^{E-SAP})t} \right) \quad (S27)$$

We can rewrite the previous equation in order to obtain an expression in terms of ratio between the radiative constants (this relation may vary slightly across the spectrum due to the different vibro-electronic transitions of each state).

$$I_{fluo}(t) \approx \left( \frac{\kappa_{rad}^{Cy}}{\kappa_{rad}^{E-SAP}} \right) e^{-(\kappa_{total}^{Cy})t} + \kappa_{rad}^{E-SAP} \left( e^{-(\kappa_{total}^{Cy})t} - e^{-(\kappa_{total}^{E-SAP})t} \right) \quad (S28)$$

The fluorescence detected at 500 nm is a convolution between the fluorescence signal  $I_{fluo}$  with the instrumental response function  $I_{IRF}$  of our up-conversion setup which is a gaussian function with a FWHM of 270 fs.

$$I_{fluo}^{convolution}(t) = \int_{t'} I_{IRF}(t - t') I_{fluo}(t') \quad (S29)$$

From the absorption spectrum, the relation between the radiative constants for the second excited state localized in the cyaninic section  $\kappa_{rad}^{Cy}$  and the first excited state localized in the azo section  $\kappa_{rad}^{E-SAP}$  is  $\left( \frac{\kappa_{rad}^{Cy}}{\kappa_{rad}^{E-SAP}} \approx \frac{1}{4} \right)$ . This value was estimated using the relation between the molar extinction coefficients in the region of 450 nm (see Figure S10).

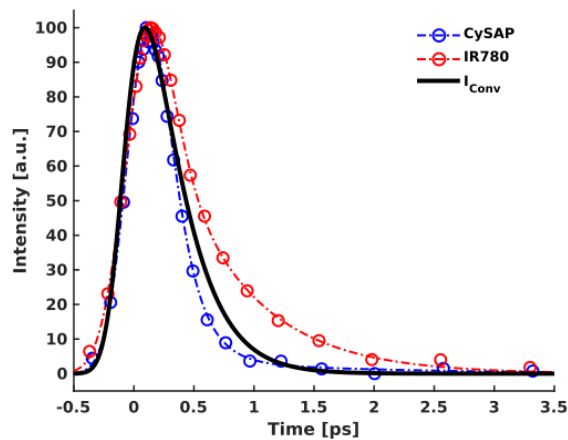

**Figure S25.** Fluorescence up-conversion traces of Cy-SAP (blue symbols) and IR780 (red symbols).

The black thick line is the result of the kinetic model that simulates the total convoluted fluorescence intensity [a.u.] as a function of time. The emission is considered to come from both chromophores according to their population evolution in equation (S28), considering the following relation between the radiative rate constants ( $\frac{\kappa_{rad}^{Cy}}{\kappa_{rad}^{E-SAP}} = \frac{1}{4}$ ), and a gaussian instrumental response function with  $FWHM = 270 fs$ . The experimental Cy-SAP and IR-780 were scaled for comparison and are included to show that this simple kinetic model approaches the actual experimental observation (blue symbols). The Cy-SAP experimental trace (blue) decays in a somewhat shorter time scale (within 30% of the kinetic model). This is probably due to the fact that the kinetic model only considers a simple Förster type energy transfer with dipole-dipole coupling. Due to the small distance between the chromophores ( $R = 0.92 nm$ ), it is expected that higher multipole interactions would accelerate the exciton migration).

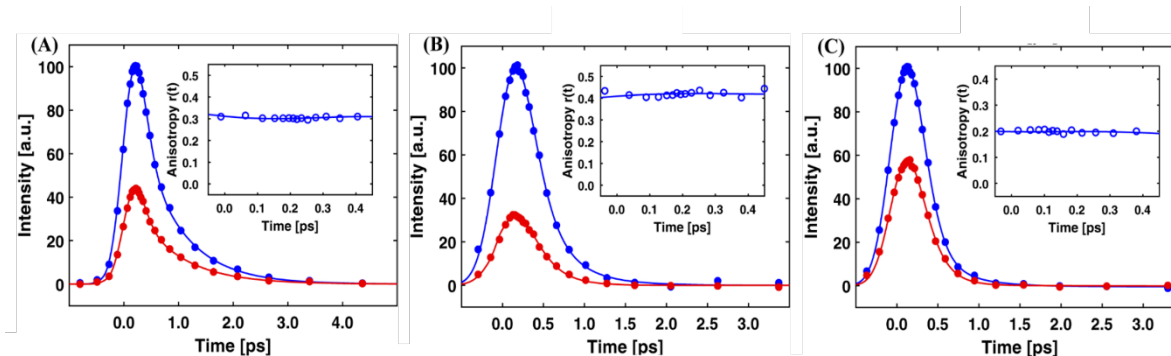

**Figure S26.** Time resolved emission at 525 nm with detection in the parallel (blue) and perpendicular orientation (red) with respect to the polarization of the 860 nm excitation pulses. (A) IR-780, (B) SAP and (C) Cy-SAP. The insets show the respective emission anisotropies  $r = \frac{I_{\parallel} - I_{\perp}}{I_{\parallel} + 2I_{\perp}}$  near  $t=0$ . In the insets, the symbols correspond with the anisotropies calculated directly from the up-conversion data, and the solid line corresponds to the anisotropies calculated from the de-convoluted exponential fits to the parallel and perpendicular traces. Other emission wavelengths are presented below for each molecule in separate figures.

The time-resolved anisotropies were used to further demonstrate differences between the excited state evolution of each chromophore alone and of their dyad Cy-SAP. As can be seen, the anisotropies due to the excitation of the IR-780 system near  $t=0$  correspond to a value of  $0.3 \pm 0.03$ . For this cyanine-only case, the observed anisotropy is expected to be determined by the net effect of the transition dipole moments involved in the two-photon absorption, and their relative orientation with the transiently emissive cyanine  $S_2$  state. Here, we note that the 0.3 anisotropy value is most likely due to the superposition of several available  $S_n$ ,  $n > 1$  states at the respective two-photon energy in the initial excitation of IR-780 (see manuscript). The anisotropy values of the SAP solutions correspond to larger anisotropy values, of  $0.42 \pm 0.03$ . This  $r(0)$  value is from the direct electronic excitation into the higher singlet states of the stilbenyl-azo system (which also may involve more than one state in the two-photon transition). Finally, the Cy-SAP anisotropy traces correspond with values of  $0.1 \pm 0.03$ ; a significantly smaller  $r(0)$  value in comparison with the IR-780 and SAP solutions (the IR780 and the Cy-SAP experiments were taken in back to back fashion in order to minimize small effects in the anisotropy results which can arise from small alignment differences). From the limited time resolution, it was not possible to reliably detect the time evolution of the anisotropies (due to the convoluted nature of the signals with the IRF). However, the difference in their near  $t=0$  values are illustrative of the difference in the excited state properties of the three systems. The much lower anisotropy for Cy-SAP in comparison with the two separate systems indicates a rapid (comparable with our time resolution) evolution towards the SAP chromophore from the cyaninic chromophore.



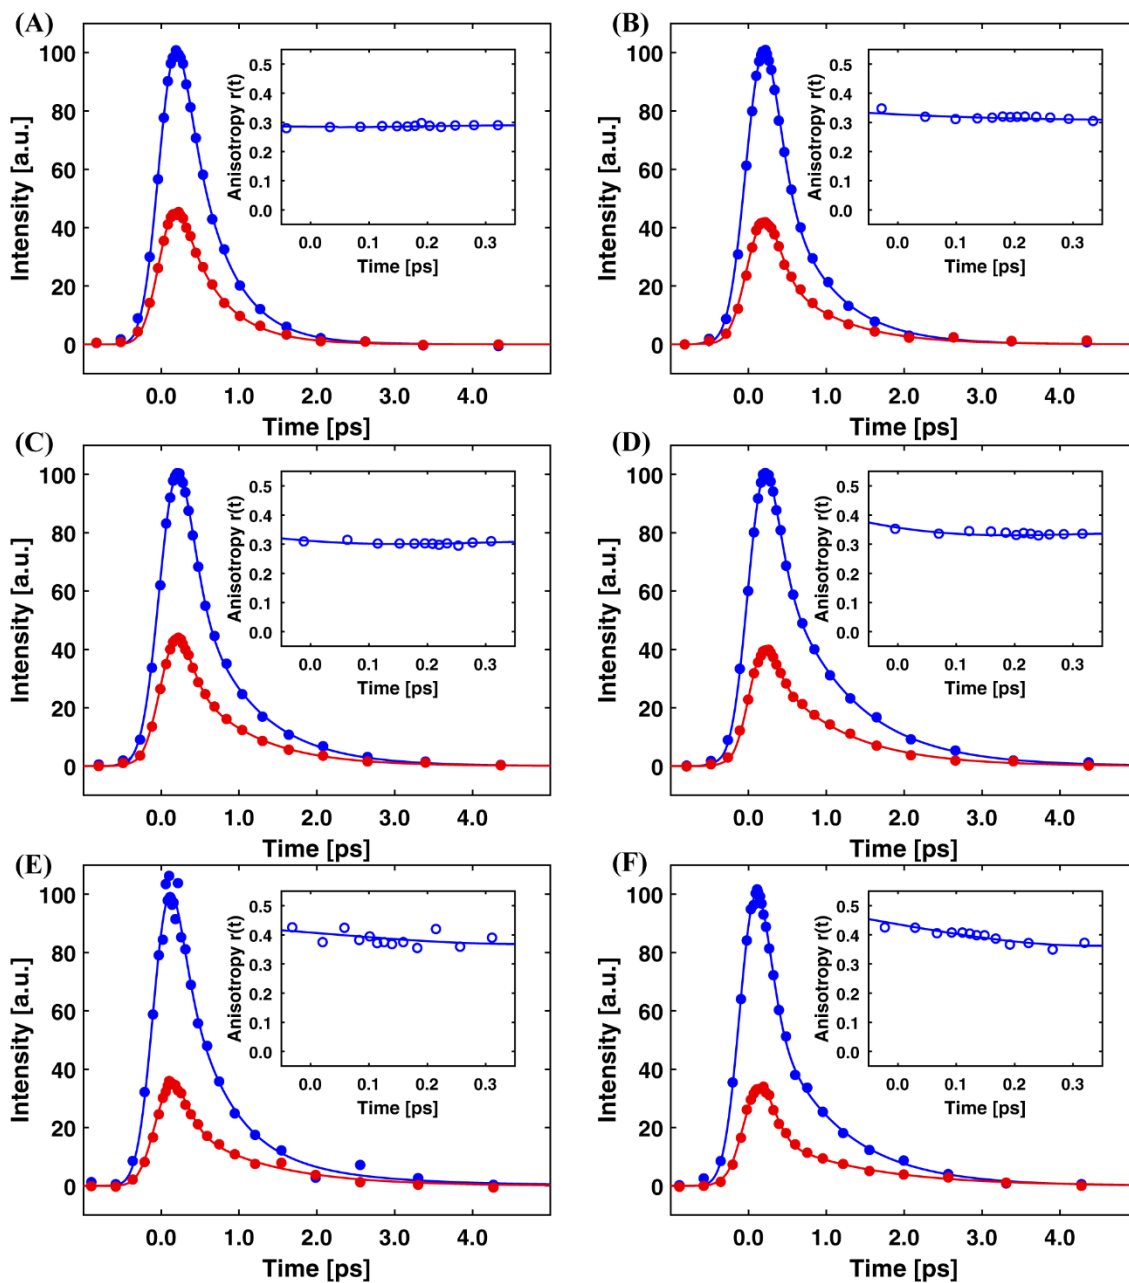

**Figure S27.** Main graphs: Femtosecond fluorescence up-conversion traces of IR-780 in acetonitrile solution detecting the parallel (blue) and perpendicular (red) emission polarization component of the fluorescence excitation with respect to the excitation polarization axis. The solid lines are fits to multiexponential decays convoluted with the instrument response function. The detection wavelengths were (A) 475 nm, (B) 500 nm, (C) 525 nm, (D) 575 nm, (E) 600 nm, (F) 625 nm, and the excitation wavelength was 860 nm. The excitation is due to a two-photon absorption process. The inset shows the emission anisotropy values around  $t=0$ . The symbols are anisotropy values calculated with the experimental data, and the solid line was calculated considering the de-convoluted fits to the time resolved emission data.

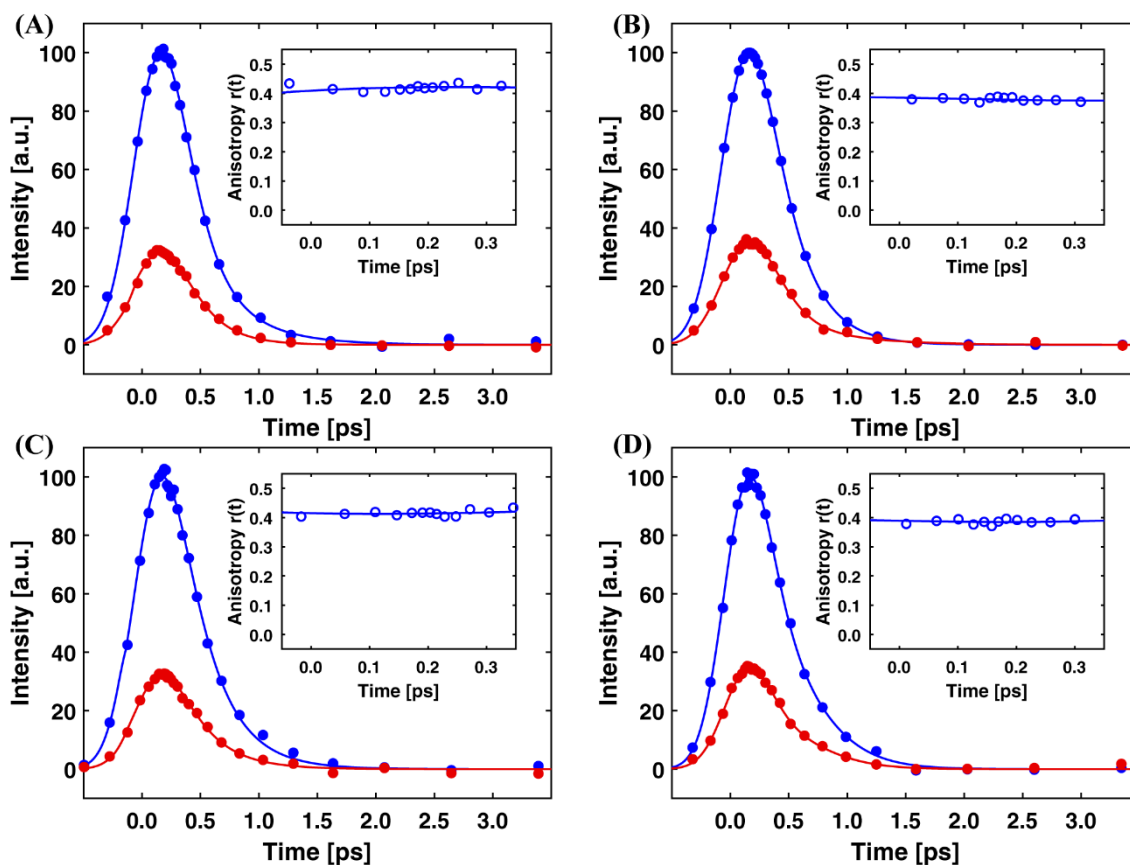

**Figure S28.** Main graph: Femtosecond fluorescence up-conversion traces of SAP in acetonitrile solution detecting the parallel (blue) and perpendicular (red) emission polarization component of the fluorescence excitation with respect to the excitation polarization axis. The solid lines are fits to multiexponential decays convoluted with the instrument response function. The detection wavelengths were (A) 525 nm, (B) 550 nm, (C) 575 nm, (D) 600 nm, and excitation wavelength was 860 nm. The excitation is due to a two-photon absorption process. The inset shows the emission anisotropy values around  $t=0$ . The symbols are anisotropy values calculated with the experimental data, and the solid line was calculated considering the de-convoluted fits to the time-resolved emission data.

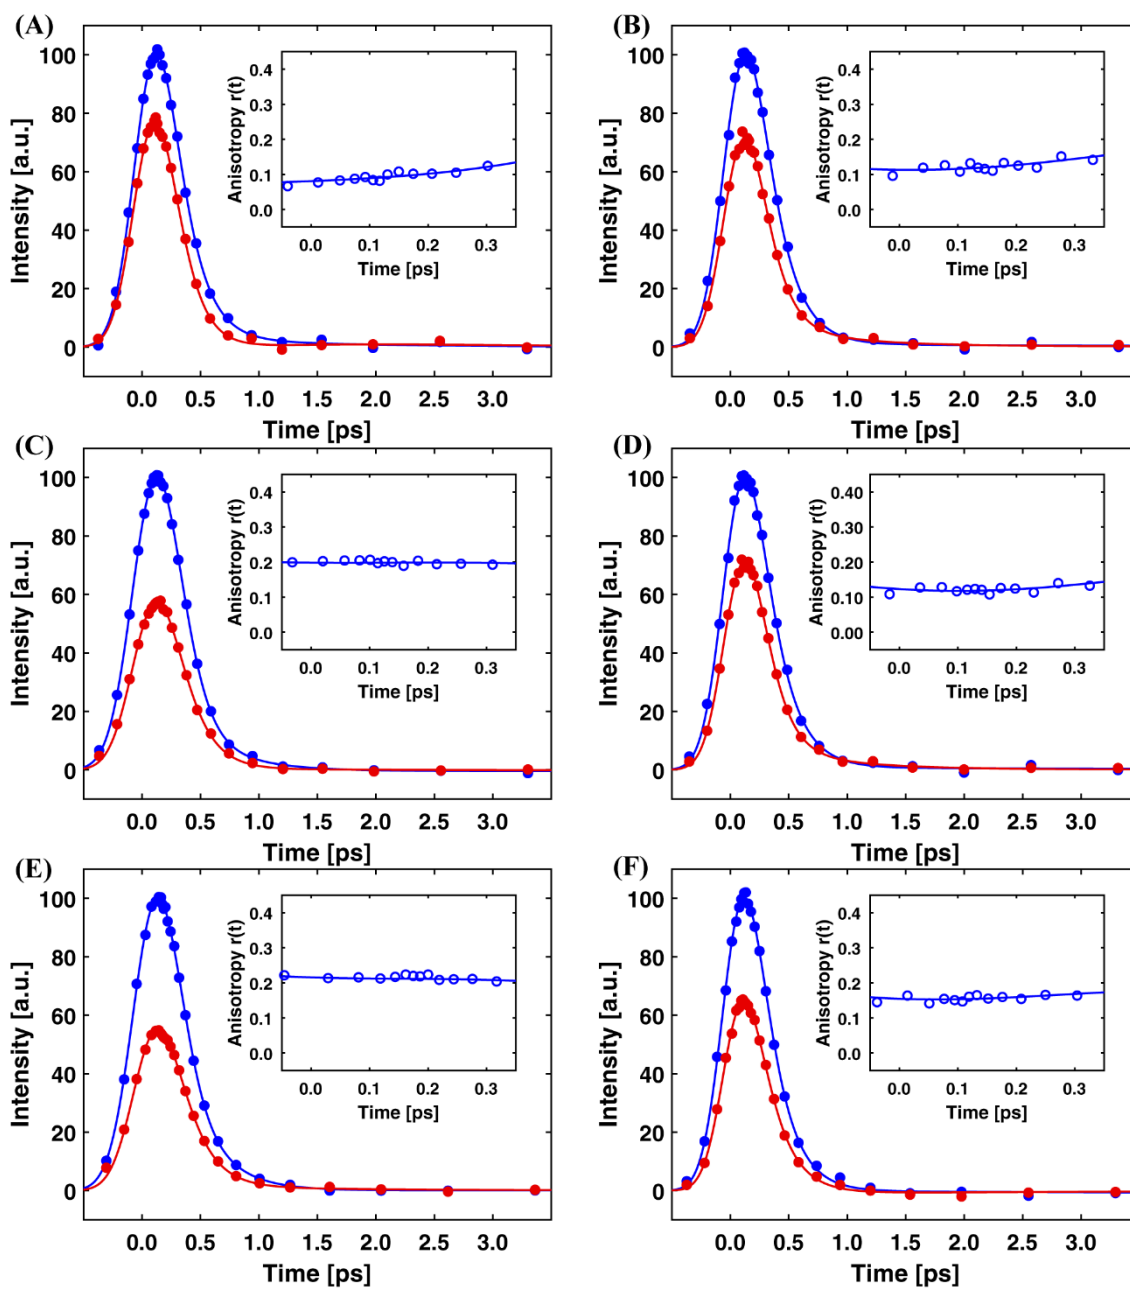

**Figure S29.** Main graph: Femtosecond fluorescence up-conversion traces of Cy-SAP in acetonitrile solution detecting the parallel (blue) and perpendicular (red) emission polarization component of the fluorescence excitation with respect to the excitation polarization axis. The solid lines are fits to multiexponential decays convoluted with the instrument response function. The detections wavelengths were (A) 475 nm, (B) 500 nm, (C) 525 nm, (D) 550 nm, (E) 575 nm, (F) 600 nm. and excitation wavelength was 860 nm. The excitation is due to a two-photon absorption process. The inset shows the emission anisotropy values around  $t=0$ . The symbols are anisotropy values calculated with the experimental data, and the solid line was calculated considering the de-convoluted fits to the time resolved emission data.

**SAP Z-matrix (compact) coordinates ground state (using PBE0 functional).**

0 1 (charge and multiplicity)

```
C
C 1 1.39275
C 1 1.39671 2 119.61700
C 2 1.38551 1 119.66754 3 359.99093
C 3 1.38432 1 120.12180 2 0.00474
C 5 1.40321 3 121.40121 1 0.00601
H 2 1.08465 1 119.37131 3 179.99284
H 4 1.08626 2 119.01838 1 179.99507
H 3 1.08644 1 119.88643 2 180.01260
H 5 1.08480 3 118.31267 1 179.99160
O 1 1.35587 2 117.80485 3 179.99322
C 6 1.45743 5 123.75721 3 179.98418
H 12 1.08840 6 114.20916 5 180.13338
C 12 1.34662 6 126.94794 5 0.09769
H 14 1.08815 12 119.04262 6 359.93228
C 14 1.45637 12 126.57016 6 179.99678
C 16 1.40462 14 123.85884 12 359.31591
C 16 1.40794 14 118.61569 12 179.33418
C 17 1.38233 16 120.89334 14 179.96532
H 17 1.08464 16 120.28490 14 359.91376
C 18 1.38158 16 121.90957 14 180.03602
H 18 1.08655 16 118.77196 14 359.99913
C 19 1.40099 17 120.96156 16 0.02310
H 19 1.08540 17 120.60539 16 179.98720
H 21 1.08366 18 120.68576 16 179.96986
N 23 1.40145 19 115.95536 17 179.99380
N 26 1.26148 23 114.95763 19 180.14716
C 27 1.36315 26 115.80589 23 180.02714
C 28 1.39741 27 134.26613 26 0.12157
N 28 1.38092 27 117.79733 26 180.08868
C 29 1.39897 28 106.97546 27 179.98664
H 29 1.07929 28 125.17411 27 0.00181
C 30 1.35057 28 108.81585 27 180.00171
H 31 1.08013 29 127.24497 28 180.01605
H 33 1.07997 30 120.75943 28 180.00690
C 30 1.44995 28 125.56018 27 0.10853
H 36 1.09077 30 110.50276 28 300.20511
H 36 1.09089 30 110.54866 28 60.94477
H 36 1.08924 30 108.29506 28 180.58173
H 11 0.96219 1 109.98463 2 180.00183
```

Ground state energy E(PBE0) = -972.80297702 Hartrees.

**SAP Z-matrix (compact) coordinates ground state (using M06 functional).**

0 1 (charge and multiplicity)

```
C
C 1 1.39041
C 1 1.39417 2 119.71747
C 2 1.38312 1 119.62763 3 0.03132
C 3 1.38208 1 120.06896 2 359.97672
C 5 1.40073 3 121.34589 1 359.92103
H 2 1.08542 1 119.16926 3 180.05741
H 4 1.08729 2 119.21135 1 179.99537
H 3 1.08710 1 119.71912 2 179.89821
H 5 1.08602 3 118.48462 1 179.82563
O 1 1.35468 2 117.74693 3 179.93751
C 6 1.45549 5 123.54079 3 180.15386
H 12 1.09045 6 114.26330 5 181.50606
C 12 1.34294 6 126.95505 5 1.72013
H 14 1.09021 12 119.01566 6 0.26344
C 14 1.45459 12 126.49413 6 180.05437
C 16 1.40221 14 123.61402 12 1.15300
C 16 1.40529 14 118.73335 12 181.07463
C 17 1.37989 16 120.80652 14 180.04296
H 17 1.08577 16 120.19846 14 0.15711
C 18 1.37946 16 121.85589 14 179.89811
H 18 1.08756 16 118.64532 14 359.90290
C 19 1.39864 17 120.93909 16 0.05397
H 19 1.08635 17 120.80589 16 180.03088
H 21 1.08459 18 120.73901 16 179.99966
N 23 1.40372 19 115.84867 17 179.94842
N 26 1.26158 23 114.95111 19 181.18332
C 27 1.36434 26 115.59595 23 180.14690
C 28 1.39377 27 134.14766 26 0.43503
N 28 1.38239 27 117.90026 26 180.39541
C 29 1.39781 28 107.07024 27 179.97661
H 29 1.07997 28 125.07819 27 0.01905
C 30 1.35210 28 108.62314 27 180.00353
H 31 1.08026 29 127.19046 28 180.02257
H 33 1.08087 30 120.58815 28 180.03097
C 30 1.45029 28 125.60567 27 0.07610
H 36 1.09186 30 110.64982 28 299.54439
H 36 1.09184 30 110.64305 28 60.22476
H 36 1.09021 30 108.37246 28 179.88591
H 11 0.96346 1 110.32792 2 180.03584
```

Ground state energy E(M06) = -973.22349353 Hartrees.

**Cy Z-matrix (compact) coordinates ground state (using PBE0 functional).**

1 1 (charge and multiplicity)

```
C
C 1 1.51821
C 1 1.51788 2 110.65443
H 1 1.09623 2 109.33109 3 239.44156
H 1 1.09337 2 110.15449 3 121.98894
C 3 1.50982 1 112.21427 2 306.63605
H 3 1.09347 1 109.49676 2 185.05193
H 3 1.09869 1 109.85507 2 68.48147
C 2 1.50955 1 111.99773 3 54.26578
H 2 1.09860 1 109.84180 3 292.45848
H 2 1.09332 1 109.53386 3 175.81852
C 9 1.39534 2 120.67837 1 155.14152
C 12 1.39265 9 125.49262 2 2.00180
C 13 1.39138 12 124.91914 9 179.85552
N 14 1.34988 13 122.28586 12 179.18883
C 14 1.52886 13 128.75147 12 359.06037
C 15 1.40276 14 111.54875 13 178.49825
C 17 1.39086 15 108.92674 14 1.30977
C 17 1.38750 15 128.67946 14 181.24344
C 19 1.39391 17 117.11953 15 180.49670
C 20 1.39274 19 121.22284 17 359.91525
C 18 1.38243 17 119.99536 15 179.43775
C 16 1.53780 14 111.61582 13 63.84735
H 23 1.09267 16 110.96204 14 53.61914
H 23 1.09147 16 111.85386 14 292.43266
H 23 1.09298 16 109.23192 14 172.89374
C 16 1.53760 14 111.84264 13 298.02035
H 27 1.09266 16 110.94327 14 306.68324
H 27 1.09309 16 109.18158 14 187.49128
H 27 1.09137 16 111.95147 14 67.95384
C 15 1.45477 14 125.80111 13 0.42561
C 31 1.52518 15 112.86662 14 86.84467
H 31 1.09257 15 108.38837 14 323.36127
H 31 1.09255 15 107.33925 14 208.93203
C 32 1.52129 31 111.43782 15 179.65183
H 32 1.09521 31 108.98626 15 57.80935
H 32 1.09521 31 109.14441 15 301.65081
H 35 1.09448 32 111.25457 31 300.03548
H 35 1.09262 32 110.79529 31 180.18136
H 35 1.09451 32 111.28093 31 60.29432
H 19 1.08372 17 122.29760 15 0.80811
H 20 1.08478 19 119.09725 17 180.03380
H 21 1.08457 20 119.70858 19 179.99672
H 22 1.08557 18 121.04601 17 180.16280
H 6 4.97069 3 120.13779 1 233.26248
H 45 1.77161 6 44.63559 3 179.01638
C 46 1.09138 45 35.81594 6 115.86260
H 47 1.09304 46 108.00311 45 117.09124
H 7 3.58132 3 151.67535 1 158.71484
H 49 2.52152 7 86.09389 3 117.81130
H 50 1.76679 49 68.70750 7 140.06348
C 51 1.09262 50 36.15186 49 65.19510
C 49 1.09522 7 129.68615 3 74.34046
```

|    |    |         |    |           |    |           |
|----|----|---------|----|-----------|----|-----------|
| C  | 47 | 2.53998 | 46 | 96.56524  | 45 | 268.66354 |
| C  | 6  | 1.39563 | 3  | 120.52319 | 1  | 202.86042 |
| C  | 54 | 1.52860 | 47 | 34.16559  | 46 | 239.91856 |
| H  | 53 | 2.17249 | 49 | 95.32376  | 7  | 339.75133 |
| N  | 54 | 1.34977 | 47 | 121.47269 | 46 | 162.81410 |
| C  | 56 | 1.51041 | 54 | 101.31990 | 47 | 242.80838 |
| C  | 57 | 1.09257 | 53 | 40.92085  | 49 | 238.29239 |
| C  | 59 | 1.39087 | 56 | 109.22588 | 54 | 359.51612 |
| C  | 59 | 1.38244 | 56 | 130.77088 | 54 | 179.58659 |
| C  | 54 | 1.39154 | 47 | 107.91839 | 46 | 13.92867  |
| H  | 53 | 1.09523 | 49 | 106.68567 | 7  | 197.14850 |
| H  | 62 | 1.08559 | 59 | 121.05180 | 56 | 0.04250   |
| C  | 61 | 1.38755 | 59 | 122.38962 | 56 | 179.62532 |
| C  | 62 | 1.39667 | 59 | 118.70167 | 56 | 180.12585 |
| H  | 52 | 1.09447 | 51 | 107.75102 | 50 | 116.11592 |
| C  | 67 | 1.39276 | 62 | 120.56148 | 59 | 0.06234   |
| C  | 56 | 1.53805 | 54 | 111.56561 | 47 | 125.78146 |
| H  | 70 | 1.09145 | 56 | 111.85503 | 54 | 292.37552 |
| H  | 66 | 1.08376 | 61 | 122.30037 | 59 | 180.66231 |
| H  | 67 | 1.08456 | 62 | 119.73526 | 59 | 179.91724 |
| H  | 70 | 1.09297 | 56 | 109.19288 | 54 | 172.85160 |
| H  | 69 | 1.08479 | 67 | 119.67744 | 62 | 179.74935 |
| H  | 60 | 1.09253 | 57 | 106.28053 | 53 | 239.61162 |
| H  | 70 | 1.09268 | 56 | 110.95437 | 54 | 53.58288  |
| H  | 55 | 1.08150 | 6  | 116.44668 | 3  | 180.03631 |
| H  | 63 | 1.08328 | 54 | 116.84677 | 47 | 147.46501 |
| H  | 12 | 1.08150 | 9  | 116.40635 | 2  | 180.93828 |
| H  | 13 | 1.08337 | 12 | 118.22432 | 9  | 0.86040   |
| C  | 6  | 1.40597 | 3  | 117.74950 | 1  | 24.96425  |
| Cl | 82 | 1.75600 | 6  | 117.59608 | 3  | 182.07165 |

Ground state energy E(PBE0) = -1966.32558585 Hartrees

**Cy Z-matrix (compact) coordinates ground state (using M06 functional).**

1 1 (charge and multiplicity)

```
C
C 1 1.51529
C 1 1.51510 2 110.41455
H 1 1.09824 2 109.30551 3 239.64751
H 1 1.09414 2 110.35288 3 122.23605
C 3 1.50773 1 112.07547 2 306.07151
H 3 1.09516 1 109.81199 2 184.33232
H 3 1.10086 1 109.81979 2 67.82267
C 2 1.50749 1 111.92493 3 54.71481
H 2 1.10079 1 109.81327 3 292.96737
H 2 1.09501 1 109.80849 3 176.41370
C 9 1.39090 2 120.67262 1 155.65717
C 12 1.39035 9 126.43989 2 2.06775
C 13 1.38814 12 123.79245 9 178.70022
N 14 1.34994 13 122.71383 12 179.04147
C 14 1.52765 13 128.39144 12 358.64558
C 15 1.40555 14 111.47171 13 177.62510
C 17 1.38784 15 108.86855 14 1.74109
C 17 1.38440 15 128.65383 14 181.76703
C 19 1.39214 17 117.05419 15 180.43181
C 20 1.39060 19 121.21862 17 359.91021
C 18 1.37994 17 120.02351 15 179.47316
C 16 1.53315 14 111.66545 13 64.92546
H 23 1.09459 16 110.87184 14 52.40344
H 23 1.09361 16 112.19997 14 291.06221
H 23 1.09460 16 109.22941 14 171.48013
C 16 1.53263 14 112.15760 13 298.73083
H 27 1.09454 16 110.86342 14 308.07019
H 27 1.09464 16 109.13575 14 189.08894
H 27 1.09337 16 112.38656 14 69.55067
C 15 1.45571 14 126.07866 13 0.67722
C 31 1.51973 15 112.36247 14 88.33861
H 31 1.09445 15 108.68666 14 324.80889
H 31 1.09542 15 107.48705 14 210.32468
C 32 1.51633 31 111.03648 15 179.23920
H 32 1.09750 31 108.93020 15 57.26309
H 32 1.09738 31 109.11292 15 301.41712
H 35 1.09552 32 111.06837 31 300.22209
H 35 1.09269 32 111.34617 31 180.11978
H 35 1.09555 32 111.08603 31 59.99079
H 19 1.08496 17 122.16959 15 0.76199
H 20 1.08523 19 119.16183 17 180.04910
H 21 1.08503 20 119.66249 19 180.01937
H 22 1.08703 18 120.95983 17 180.11225
H 6 4.90525 3 121.23909 1 234.00445
H 45 1.77443 6 44.96414 3 177.84376
C 46 1.09333 45 35.82813 6 115.75664
H 47 1.09462 46 107.78954 45 116.83773
H 7 3.77427 3 150.03440 1 156.84748
H 49 2.52317 7 86.76196 3 118.96300
H 50 1.76774 49 69.04383 7 142.56637
C 51 1.09271 50 36.16787 49 64.82340
C 49 1.09740 7 128.32390 3 74.01352
```



|    |    |         |    |           |    |           |
|----|----|---------|----|-----------|----|-----------|
| C  | 47 | 2.53917 | 46 | 97.77621  | 45 | 268.90792 |
| C  | 6  | 1.39080 | 3  | 120.52315 | 1  | 202.84598 |
| C  | 54 | 1.52753 | 47 | 33.98217  | 46 | 241.00480 |
| H  | 53 | 2.17031 | 49 | 95.15371  | 7  | 342.73824 |
| N  | 54 | 1.35004 | 47 | 121.46368 | 46 | 164.20839 |
| C  | 56 | 1.50802 | 54 | 101.39086 | 47 | 243.01551 |
| C  | 57 | 1.09444 | 53 | 40.75818  | 49 | 238.12620 |
| C  | 59 | 1.38795 | 56 | 109.37210 | 54 | 359.36278 |
| C  | 59 | 1.37973 | 56 | 130.53739 | 54 | 179.35492 |
| C  | 54 | 1.38820 | 47 | 107.55236 | 46 | 14.82503  |
| H  | 53 | 1.09749 | 49 | 106.46407 | 7  | 200.33981 |
| H  | 62 | 1.08698 | 59 | 120.97983 | 56 | 0.14098   |
| C  | 61 | 1.38457 | 59 | 122.40811 | 56 | 179.47109 |
| C  | 62 | 1.39450 | 59 | 118.63039 | 56 | 180.25820 |
| H  | 52 | 1.09555 | 51 | 107.75746 | 50 | 115.89632 |
| C  | 67 | 1.39054 | 62 | 120.56244 | 59 | 0.08189   |
| C  | 56 | 1.53342 | 54 | 111.74154 | 47 | 126.23095 |
| H  | 70 | 1.09359 | 56 | 112.26450 | 54 | 290.94083 |
| H  | 66 | 1.08491 | 61 | 122.18525 | 59 | 180.72861 |
| H  | 67 | 1.08503 | 62 | 119.77892 | 59 | 179.89435 |
| H  | 70 | 1.09459 | 56 | 109.16047 | 54 | 171.38969 |
| H  | 69 | 1.08524 | 67 | 119.61895 | 62 | 179.69773 |
| H  | 60 | 1.09544 | 57 | 106.11640 | 53 | 239.52688 |
| H  | 70 | 1.09460 | 56 | 110.87188 | 54 | 52.34588  |
| H  | 55 | 1.08123 | 6  | 116.14587 | 3  | 180.06914 |
| H  | 63 | 1.08565 | 54 | 117.53154 | 47 | 147.64028 |
| H  | 12 | 1.08144 | 9  | 116.14164 | 2  | 180.85614 |
| H  | 13 | 1.08572 | 12 | 118.77442 | 9  | 359.95236 |
| C  | 9  | 1.40339 | 2  | 117.59612 | 1  | 333.19486 |
| Cl | 82 | 1.76636 | 9  | 117.68096 | 2  | 178.86214 |

Ground state energy E(M06) = -1966.97522035 Hartrees

## References

1. Hochberger-Roa, F. *et al.* Synthesis and Catalytic Applications of [N,N]-Pyrrole Ligands for the Regioselective Synthesis of Styrene Derivatives. *Adv. Synth. Catal.* **361**, 4055–4064 (2019).
2. Rodríguez-Córdoba, W., Noria, R., Guarín, C. A. & Peon, J. Ultrafast photosensitization of phthalocyanines through their axial ligands. *J. Am. Chem. Soc.* **133**, 4698–4701 (2011).
3. Rodríguez-Córdoba, W., Sierra, C. A., Ochoa Puentes, C., Lahti, P. M. & Peon, J. Photoinduced energy transfer in bichromophoric pyrene-PPV oligomer systems: The role of flexible donor-acceptor bridges. *J. Phys. Chem. B* **116**, 3490–3503 (2012).
4. Gutiérrez-Arzaluz, L., López-Arteaga, R., Cortés-Guzmán, F. & Peon, J. Nitrated Fluorophore Formation upon Two-Photon Excitation of an Azide with Extended Conjugation. *J. Phys. Chem. B* **121**, 9910–9919 (2017).
5. Gutiérrez-Arzaluz, L., Guarín, C. A., Rodríguez-Córdoba, W. & Peon, J. Dynamics of the formation of a charge transfer state in 1,2-bis(9-anthryl)acetylene in polar solvents: Symmetry reduction with the participation of an intramolecular torsional coordinate. *J. Phys. Chem. B* **117**, 12175–12183 (2013).
6. Fulmer, G. R. *et al.* NMR chemical shifts of trace impurities: Common laboratory solvents, organics, and gases in deuterated solvents relevant to the organometallic chemist. *Organometallics* **29**, 2176–2179 (2010).
7. Frisch, M. J. *et al.* Gaussian 09, Revision E.01. (2009).
8. Andzelm, J. *et al.* Performance of DFT methods in the calculation of optical spectra of TCF-chromophores. *J. Chem. Theory Comput.* **5**, 2835–2846 (2009).
9. Jacquemin, D., Perpète, E. A., Ciofini, I. & Adamo, C. Assessment of functionals for TD-DFT calculations of singlet-triplet transitions. *J. Chem. Theory Comput.* **6**, 1532–1537 (2010).
10. Jacquemin, D., Brémond, E., Planchat, A., Ciofini, I. & Adamo, C. TD-DFT vibronic couplings in anthraquinones: From basis set and functional benchmarks to applications for industrial dyes. *J. Chem. Theory Comput.* **7**, 1882–1892 (2011).
11. Bousquet, D. *et al.* Excited-state geometries of heteroaromatic compounds: A comparative TD-DFT and SAC-CI study. *J. Chem. Theory Comput.* **9**, 2368–2379 (2013).
12. Jacquemin, D., Perpète, E. A., Scuseria, G. E., Ciofini, I. & Adamo, C. TD-DFT performance for the visible absorption spectra of organic dyes: Conventional versus long-range hybrids. *J. Chem. Theory Comput.* **4**, 123–135 (2008).
13. Bousquet, D. *et al.* Benchmark study on the triplet excited-state geometries and phosphorescence energies of heterocyclic compounds: Comparison between TD-PBE0 and SAC-CI. *J. Chem. Theory Comput.* **10**, 3969–3979 (2014).
14. Jacquemin, D., Wathelet, V., Perpète, E. A. & Adamo, C. Extensive TD-DFT benchmark: Singlet-excited states of organic molecules. *J. Chem. Theory Comput.* **5**, 2420–2435 (2009).
15. Ravelli, D., Dondi, D., Fagnoni, M., Albini, A. & Bagno, A. Predicting the UV spectrum of polyoxometalates by TD-DFT. *J. Comput. Chem.* **32**, 2983–2987 (2011).
16. Cooper, J. K., Grant, C. D. & Zhang, J. Z. Experimental and TD-DFT study of optical absorption of six explosive molecules: RDX, HMX, PETN, TNT, TATP, and HMTD. *J. Phys. Chem. A* **117**, 6043–6051 (2013).
17. Taniguchi, M., Du, H. & Lindsey, J. S. PhotochemCAD 3: Diverse Modules for Photophysical Calculations with Multiple Spectral Databases. *Photochem. Photobiol.* **94**, 277–289 (2018).
18. Calbo, J. *et al.* Tuning Azoheteroarene Photoswitch Performance through Heteroaryl Design. *J. Am. Chem. Soc.* **139**, 1261–1274 (2017).
19. Rodríguez-Romero, J. *et al.* Fluorophore Release from a Polymethinic Photoremovable Protecting Group Through a Nonlinear Optical Process. *ChemPhotoChem* **1**, 397–407 (2017).
20. Muñoz-Rugeles, L. *et al.* Synthesis and Photodynamics of Stilbenyl-Azopyrroles: Two-Photon Controllable Photoswitching Systems. *ChemPhotoChem* **4**, 144–154 (2020).

## Author Contributions

Emmanuel Villatoro, Leonardo Muñoz-Rugeles, Jesús Durán-Hernández, Bernardo Salcido, Nuria Esturau-Escofet: investigation and formal analysis.

Jose G. López-Cortés, M. Carmen Ortega-Alfaro and Jorge Peón: Investigation, project administration, validation, manuscript writing, funding acquisition.
